# Supplementary material for: Highly efficient synthesis of chiral quaternary 3-aminooxindoles promoted by zinc(ii) chloride via Et2Zn-catalysed addition of Grignard reagents to isaltin-derived N-tert-butanesulfinyl ketimines
Source: Royal Society of Chemistry journal article supplement (doi:10.1039/c7ra07692d), 2017-01-01
Supplement: c7ra07692d1.pdf [file c7ra07692d1.pdf]

Supplementary Information:

**Highly efficient synthesis of chiral quaternary 3-aminooxindoles promoted by Zinc (II) Chloride *via* Et<sub>2</sub>Zn catalyzed addition of Grignard reagents to Isaltin-derived *N*-*tert*-butanesulfinyl ketimines**

Shiwei Yang,<sup>ab</sup> Guangling Bian,<sup>\*a</sup> Zhongxiang Chen,<sup>a</sup> Xiaohan Xia,<sup>a</sup> Mi Zhou,<sup>a</sup> Caiyan Cui,<sup>a</sup> and Ling Song<sup>\*ab</sup>

<sup>a</sup>The Key Laboratory of Coal to Ethylene Glycol and Its Related Technology, Fujian Institute of Research on the Structure of Matter, Chinese Academy of Sciences, Fuzhou, Fujian 350002, P. R. China.

<sup>b</sup>University of Chinese Academy of Sciences, 100049, Beijing, P. R. China.

E-mail: [glb@fjirsm.ac.cn](mailto:glb@fjirsm.ac.cn) ; [songling@fjirsm.ac.cn](mailto:songling@fjirsm.ac.cn).

**Table of Contents**

|                                                                                 |   |
|---------------------------------------------------------------------------------|---|
| <b>General Methods</b> .....                                                    | 3 |
| <b>General reaction procedure for 4</b> .....                                   | 3 |
| <b>Characterization of NMR and HRMS or HPLC of the Obtained compounds</b> ..... | 3 |
| <b>1. <sup>1</sup>H NMR Spectrum of 4a</b> .....                                | 6 |
| <b>2. <sup>13</sup>C NMR Spectrum of 4a</b> .....                               | 6 |
| <b>3. <sup>1</sup>H NMR Spectrum of 4a'</b> .....                               | 7 |
| <b>4. <sup>13</sup>C NMR Spectrum of 4a'</b> .....                              | 7 |
| <b>5. HPLC (4a mixed with 4a')</b> .....                                        | 8 |
| <b>6. HPLC (4a without purification)</b> .....                                  | 8 |
| <b>7. <sup>1</sup>H NMR Spectrum of 4b</b> .....                                | 9 |

|                                                  |    |
|--------------------------------------------------|----|
| 8. $^{13}\text{C}$ NMR Spectrum of 4b. . . . .   | 9  |
| 9. $^1\text{H}$ NMR Spectrum of 4c. . . . .      | 10 |
| 10. $^{13}\text{C}$ NMR Spectrum of 4c. . . . .  | 10 |
| 11. $^1\text{H}$ NMR Spectrum of 4d. . . . .     | 11 |
| 12. $^{13}\text{C}$ NMR Spectrum of 4d. . . . .  | 11 |
| 13. $^1\text{H}$ NMR Spectrum of 4e. . . . .     | 12 |
| 14. $^{13}\text{C}$ NMR Spectrum of 4e. . . . .  | 12 |
| 15. $^1\text{H}$ NMR Spectrum of 4f. . . . .     | 13 |
| 16. $^{13}\text{C}$ NMR Spectrum of 4f. . . . .  | 13 |
| 17. $^1\text{H}$ NMR Spectrum of 4g. . . . .     | 14 |
| 18. $^{13}\text{C}$ NMR Spectrum of 4g. . . . .  | 14 |
| 19. $^1\text{H}$ NMR Spectrum of 4h. . . . .     | 15 |
| 20. $^{13}\text{C}$ NMR Spectrum of 4h. . . . .  | 15 |
| 21. $^1\text{H}$ NMR Spectrum of 4h'. . . . .    | 16 |
| 22. $^{13}\text{C}$ NMR Spectrum of 4h'. . . . . | 16 |
| 23. $^1\text{H}$ NMR Spectrum of 4i. . . . .     | 17 |
| 24. $^{13}\text{C}$ NMR Spectrum of 4i. . . . .  | 17 |
| 25. $^1\text{H}$ NMR Spectrum of 4j. . . . .     | 18 |

|                                                                                                    |    |
|----------------------------------------------------------------------------------------------------|----|
| 26. $^{13}\text{C}$ NMR Spectrum of 4j. . . . .                                                    | 18 |
| 27. $^1\text{H}$ NMR Spectrum of 4k. . . . .                                                       | 19 |
| 28. $^{13}\text{C}$ NMR Spectrum of 4k. . . . .                                                    | 19 |
| 29. $^1\text{H}$ NMR Spectrum of 4l. . . . .                                                       | 20 |
| 30. $^{13}\text{C}$ NMR Spectrum of 4l. . . . .                                                    | 20 |
| 31. $^1\text{H}$ NMR Spectrum of 4m. . . . .                                                       | 21 |
| 32. $^{13}\text{C}$ NMR Spectrum of 4m. . . . .                                                    | 21 |
| 33. $^1\text{H}$ NMR Spectrum of 4n. . . . .                                                       | 22 |
| 34. $^{13}\text{C}$ NMR Spectrum of 4n. . . . .                                                    | 22 |
| 35. $^1\text{H}$ NMR Spectrum of 5. . . . .                                                        | 23 |
| 36. $^{13}\text{C}$ NMR Spectrum of 5. . . . .                                                     | 23 |
| 37. Determination of the Absolute Configuration of 4m by single-crystal X-ray<br>analysis. . . . . | 24 |

### General Methods.

All experiments were carried out in dried glassware with magnetic stirring under an atmosphere of dry nitrogen.  $^1\text{H}$  NMR (400 MHz),  $^{13}\text{C}$  NMR (100 MHz) spectra were recorded in  $\text{CDCl}_3$  solutions using a 400 MHz spectrometer. Chemical shifts were reported in parts per million (ppm,  $\delta$ ) relative to  $\text{CDCl}_3$  ( $\delta$  7.26 for  $^1\text{H}$  NMR), or  $\text{CDCl}_3$  ( $\delta$  77.0 for  $^{13}\text{C}$  NMR). Multiplicities are indicated as s (singlet), d (doublet), t (triplet), q (quartet), m (multiplet) and br (broad). Commercial reagents were used as received unless

otherwise indicated. All solvents were purified and dried prior to use according to standard methods. Optical rotations were measured on a polarimeter and reported as follows: (c g/100 mL, solvent).

#### General reaction procedure for 4.

A suspension of ketimine **3** (0.2937 mmol) and ZnCl<sub>2</sub> (0.1762 mmol) in 2 ml of dried THF under nitrogen atmosphere was stirred for 30 mins at -20 °C. The corresponding Grignard reagent (0.8811 mmol) was then slowly added. After Et<sub>2</sub>Zn (0.08811 mmol) was added completely, dropwise, the reaction mixture was stirred for 18-24 h at -20 °C. The reaction was quenched with 10 drops of a saturated NaCl solution, and the mixture was diluted with EA, dried by anhydrous Na<sub>2</sub>SO<sub>4</sub> and concentrated *in vacuo*. The crude addition product **4** was purified by flash chromatography (petroleum ether/ethyl acetate 5:1 to 1:1) to obtain the title product.

#### Characterization NMR and HRMS or HPLC of the Obtained Compounds.

(S)-N-((S)-1,3-dibenzyl-2-oxoindolin-3-yl)-2-methylpropane-2-sulfonamide **4a**

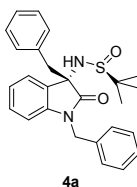

a white solid with the yield (92%). mp: 86-91 °C. [ $\alpha$ ]<sub>D</sub><sup>29</sup> 55.8 (c1, CHCl<sub>3</sub>). <sup>1</sup>H NMR (400 MHz, CDCl<sub>3</sub>)  $\delta$  1.23 (s, 9H), 3.50 (dd, *J* = 22.0, 12.7 Hz, 2H), 4.52 (s, 1H), 4.72 (dd, *J* = 134.4, 16.1 Hz, 2H), 6.43 (d, *J* = 8.3 Hz, 1H), 6.69 (d, *J* = 7.1 Hz, 2H), 6.90 (d, *J* = 7.3 Hz, 2H), 7.04-7.35 (m, 8H), 7.66 (d, *J* = 4.6 Hz, 1H); <sup>13</sup>C NMR (100 MHz, CDCl<sub>3</sub>)  $\delta$  22.45, 43.70, 45.22, 56.64, 65.91, 109.62, 122.71, 126.03, 126.59, 127.09, 127.32, 127.88, 128.13, 128.64, 129.68, 130.44, 133.67, 134.83, 142.66, 175.59. HRMS (ESI) calcd For [C<sub>26</sub>H<sub>29</sub>N<sub>2</sub>O<sub>2</sub>S, M+H]<sup>+</sup>: 433.1944, found: 433.1942.

(S)-N-((R)-1,3-dibenzyl-2-oxoindolin-3-yl)-2-methylpropane-2-sulfonamide **4a'**

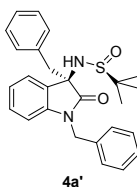

a pale yellow solid. [ $\alpha$ ]<sub>D</sub><sup>29</sup> -45 (c1, CHCl<sub>3</sub>). <sup>1</sup>H NMR (400 MHz, CDCl<sub>3</sub>)  $\delta$  1.27 (s, 9H), 3.33 (dd, *J* = 41.9, 12.9 Hz, 2H), 4.62 (s, 1H), 4.78 (dd, *J* = 184.6, 16.1 Hz, 2H), 6.44 (d, *J* = 7.7 Hz, 1H), 6.73 (d, *J* = 7.7 Hz, 2H), 6.91 (d, *J* = 7.3 Hz, 2H), 7.05-7.25 (m, 7H), 7.29 (d, *J* = 8.8 Hz, 2H); <sup>13</sup>C NMR (101 MHz, CDCl<sub>3</sub>)  $\delta$  22.76, 44.02, 44.77, 56.00, 65.08, 110.05, 122.40, 125.91, 126.64, 127.13, 127.16, 127.98, 128.60, 129.97, 130.66, 133.41, 135.10, 143.58, 177.15.

(S)-N-((S)-1,3-dibenzyl-5-methyl-2-oxoindolin-3-yl)-2-methylpropane-2-sulfonamide **4b**

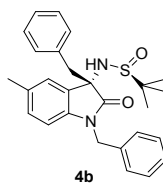

a pale yellow solid with the yield (92%). mp: 48-49 °C. [ $\alpha$ ]<sub>D</sub><sup>29</sup> 51.2 (c1, CHCl<sub>3</sub>). <sup>1</sup>H NMR (400 MHz, CDCl<sub>3</sub>)  $\delta$  1.23 (s, 9H), 2.39 (s, 3H), 3.47 (dd, *J* = 33.7, 12.7 Hz, 2H), 4.11 (s, 1H), 4.71 (dd, *J* = 136.0, 16.0 Hz, 2H),

6.32 (d,  $J = 8.0$  Hz, 1H), 6.69 (d,  $J = 7.0$  Hz, 2H), 6.94 (m, 3H), 7.25-7.04 (m, 6H), 7.46 (s, 1H);  $^{13}\text{C}$  NMR (101 MHz,  $\text{CDCl}_3$ )  $\delta$  21.25, 22.47, 43.69, 45.25, 56.62, 65.94, 109.34, 126.58, 126.66, 127.07, 127.25, 127.80, 128.11, 128.59, 130.01, 130.48, 132.25, 133.75, 134.96, 140.27, 175.53. HRMS (ESI) calcd For  $[\text{C}_{27}\text{H}_{31}\text{N}_2\text{O}_2\text{S}, \text{M}+\text{H}]^+$ : 447.2101, found: 447.2098.

(*S*)-*N*-((*S*)-1,3-dibenzyl-5-methoxy-2-oxoindolin-3-yl)-2-methylpropane-2-sulfinamide **4c**

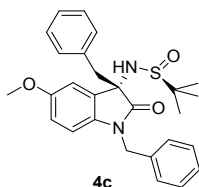

a white solid with the yield (94%). mp: 69-70 °C.  $[\alpha]_{\text{D}}^{29}$  49.9 (c1,  $\text{CHCl}_3$ ).  $^1\text{H}$  NMR (400 MHz,  $\text{CDCl}_3$ )  $\delta$  1.28 (s, 9H), 3.55 (s, 2H), 3.84 (s, 3H), 4.70 (dd,  $J = 146.3, 16.0$  Hz, 2H), 4.76 (s, 1H), 6.32 (d,  $J = 8.6$  Hz, 1H), 6.72-6.62 (m, 3H), 6.93 (d,  $J = 7.3$  Hz, 2H), 7.23-7.06 (m, 6H), 7.39 (d,  $J = 2.4$  Hz, 1H);  $^{13}\text{C}$  NMR (101 MHz,  $\text{CDCl}_3$ )  $\delta$  22.63, 43.86, 44.74, 56.06, 66.75, 110.25, 112.77, 114.84, 126.61, 127.10, 127.31, 128.12, 128.61, 128.85, 130.45, 133.46, 134.82, 135.96, 156.03, 175.24. HRMS (ESI) calcd For  $[\text{C}_{27}\text{H}_{30}\text{N}_2\text{O}_2\text{S}, \text{M}+\text{H}]^+$ : 485.1869, found: 485.1871.

(*S*)-*N*-((*S*)-1,3-dibenzyl-5-chloro-2-oxoindolin-3-yl)-2-methylpropane-2-sulfinamide **4d**

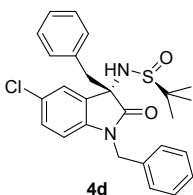

a white solid with the yield (75%). mp: 45-48 °C.  $[\alpha]_{\text{D}}^{29}$  25.4 (c1,  $\text{CHCl}_3$ ).  $^1\text{H}$  NMR (400 MHz,  $\text{CDCl}_3$ )  $\delta$  1.24 (s, 9H), 3.48 (dd,  $J = 21.3, 13.0$  Hz, 2H), 4.11 (s, 1H), 4.71 (dd,  $J = 129.0, 16.1$  Hz, 2H), 6.35 (d,  $J = 8.4$  Hz, 1H), 6.68 (d,  $J = 6.9$  Hz, 2H), 6.93 (d,  $J = 7.2$  Hz, 2H), 7.25-7.09 (m, 7H), 7.61 (s, 1H);  $^{13}\text{C}$  NMR (101 MHz,  $\text{CDCl}_3$ )  $\delta$  22.41, 43.83, 45.08, 56.89, 66.01, 110.62, 126.19, 126.56, 127.30, 127.51, 128.22, 128.30, 128.72, 129.65, 129.85, 130.40, 133.20, 134.34, 141.13, 175.12. HRMS (ESI) calcd For  $[\text{C}_{26}\text{H}_{27}\text{ClN}_2\text{O}_2\text{SNa}, \text{M}+\text{Na}]^+$ : 489.1374, found: 489.1382.

(*S*)-*N*-((*S*)-1,3-dibenzyl-5-bromo-2-oxoindolin-3-yl)-2-methylpropane-2-sulfinamide **4e**

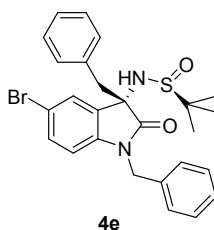

a white solid with the yield (80%). mp: 79-80 °C.  $[\alpha]_{\text{D}}^{29}$  30.9 (c1,  $\text{CHCl}_3$ ).  $^1\text{H}$  NMR (400 MHz,  $\text{CDCl}_3$ )  $\delta$  1.24 (s, 9H), 3.48 (dd,  $J = 22.9, 12.8$  Hz, 2H), 4.06 (s, 1H), 4.72 (dd,  $J = 134.7, 16.1$  Hz, 2H), 6.30 (d,  $J = 8.3$  Hz, 1H), 6.67 (d,  $J = 7.1$  Hz, 2H), 6.93 (d,  $J = 7.3$  Hz, 2H), 7.12-7.22 (m, 7H), 7.75 (s, 1H);  $^{13}\text{C}$  NMR (101 MHz,  $\text{CDCl}_3$ )  $\delta$  22.43, 43.81, 45.13, 56.87, 65.91, 111.13, 115.44, 126.55, 127.32, 127.51, 128.32, 128.74, 128.93, 130.20, 130.41, 132.57, 133.20, 134.30, 141.62, 175.00. HRMS (ESI) calcd For  $[\text{C}_{26}\text{H}_{27}\text{BrN}_2\text{O}_2\text{SNa}, \text{M}+\text{Na}]^+$ : 533.0869, found: 533.0864.

(*S*)-*N*-((*S*)-1,3-dibenzyl-6-chloro-2-oxoindolin-3-yl)-2-methylpropane-2-sulfinamide **4f**

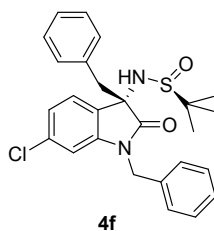

a white solid with the yield (85%). mp: 58-60 °C.  $[\alpha]_D^{29}$  13.9 (c1, CHCl<sub>3</sub>). <sup>1</sup>H NMR (400 MHz, CDCl<sub>3</sub>) δ 1.24 (s, 9H), 3.47 (dd, *J* = 36.1, 12.7 Hz, 2H), 4.19 (s, 1H), 4.71 (dd, *J* = 124.8, 16.1 Hz, 2H), 6.45 (d, *J* = 1.8 Hz, 1H), 6.72 (d, *J* = 6.9 Hz, 2H), 6.92 (d, *J* = 7.3 Hz, 2H), 7.27-7.09 (m, 7H), 7.55 (d, *J* = 8.0 Hz, 1H); <sup>13</sup>C NMR (101 MHz, CDCl<sub>3</sub>) δ 22.42, 43.80, 45.03, 56.77, 65.61, 110.22, 122.75, 126.31, 126.53, 127.02, 127.33, 127.58, 128.33, 128.80, 130.39, 133.24, 134.24, 135.47, 143.86, 175.61. HRMS (ESI) calcd For [C<sub>26</sub>H<sub>27</sub>ClN<sub>2</sub>O<sub>2</sub>SNa, M+Na]<sup>+</sup>: 489.1374, found: 489.1370.

(S)-N-((S)-1,3-dibenzyl-5,7-dimethyl-2-oxoindolin-3-yl)-2-methylpropane-2-sulfonamide **4g**

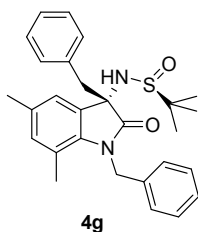

a pale yellow solid with the yield (95%). mp: 67-69 °C.  $[\alpha]_D^{29}$  57.8 (c1, CHCl<sub>3</sub>). <sup>1</sup>H NMR (400 MHz, CDCl<sub>3</sub>) δ 1.23 (s, 9H), 2.00 (s, 3H), 2.37 (s, 3H), 3.46 (dd, *J* = 31.7, 12.7 Hz, 2H), 4.08 (s, 1H), 4.96 (dd, *J* = 76.0, 17.0 Hz, 2H), 6.59 (d, *J* = 6.2 Hz, 2H), 6.78 (s, 1H), 6.93 (d, *J* = 7.2 Hz, 2H), 7.12-7.24 (m, 6H), 7.34 (s, 1H); <sup>13</sup>C NMR (101 MHz, CDCl<sub>3</sub>) δ 18.37, 20.92, 22.48, 44.91, 45.33, 56.60, 65.20, 119.74, 124.62, 125.24, 126.83, 127.09, 128.13, 128.70, 130.59, 132.24, 133.85, 134.23, 137.06, 138.46, 176.46. HRMS (ESI) calcd For [C<sub>28</sub>H<sub>32</sub>N<sub>2</sub>O<sub>2</sub>SNa, M+Na]<sup>+</sup>: 483.2077, found: 483.2079.

(S)-N-((S)-1,3-dibenzyl-6-bromo-2-oxoindolin-3-yl)-2-methylpropane-2-sulfonamide **4h**

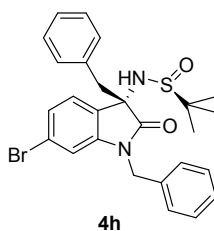

a white solid with the yield (92%). mp: 62-64 °C.  $[\alpha]_D^{29}$  35.1 (c1, CHCl<sub>3</sub>). <sup>1</sup>H NMR (400 MHz, CDCl<sub>3</sub>) δ 1.22 (s, 9H), 3.46 (dd, *J* = 39.8, 12.8 Hz, 2H), 4.06 (s, 1H), 4.71 (dd, *J* = 119.9, 16.1 Hz, 2H), 6.61 (s, 1H), 6.73 (d, *J* = 7.0 Hz, 2H), 6.92 (d, *J* = 6.9 Hz, 2H), 7.12-7.27 (m, 7H), 7.48 (d, *J* = 8.0 Hz, 1H); <sup>13</sup>C NMR (101 MHz, CDCl<sub>3</sub>) δ 22.41, 43.80, 45.00, 56.78, 65.63, 112.93, 123.42, 125.68, 126.53, 126.87, 127.35, 127.59, 128.35, 128.81, 130.39, 133.22, 134.23, 143.97, 175.50. HRMS (ESI) calcd For [C<sub>26</sub>H<sub>27</sub>BrN<sub>2</sub>O<sub>2</sub>SNa, M+Na]<sup>+</sup>: 533.0869, found: 533.0867.

(S)-N-((S)-3-benzyl-1-methyl-2-oxoindolin-3-yl)-2-methylpropane-2-sulfonamide **4h'**

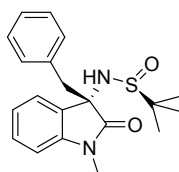

**4h'**

a white solid with the yield (75%). mp: 108-109 °C.  $[\alpha]_D^{29}$  39.9 (c1, CHCl<sub>3</sub>). <sup>1</sup>H NMR (400 MHz, CDCl<sub>3</sub>) δ 1.21 (s, 9H), 2.96 (s, 3H), 3.38 (dd, *J* = 26.4, 12.6 Hz, 2H), 4.04 (s, 1H), 6.61 (d, *J* = 7.8 Hz, 1H), 6.86 (d, *J* = 6.8 Hz, 2H), 7.04-7.16 (m, 4H), 7.26 (d, *J* = 8.0 Hz, 1H), 7.55 (d, *J* = 7.4 Hz, 1H); <sup>13</sup>C NMR (101 MHz, CDCl<sub>3</sub>) δ 22.42, 26.01, 45.70, 56.66, 65.88, 108.19, 122.66, 125.75, 125.95, 127.05, 127.80, 128.09, 129.57, 130.09, 133.54, 143.16, 175.53. HRMS (ESI) calcd For [C<sub>20</sub>H<sub>24</sub>N<sub>2</sub>O<sub>2</sub>SNa, M+Na]<sup>+</sup>: 379.1451, found: 379.1457.

(*S*)-*N*-((*S*)-1-benzyl-3-isopropyl-2-oxoindolin-3-yl)-2-methylpropane-2-sulfinamide **4i**

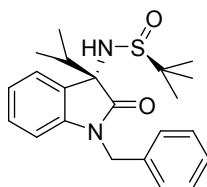

**4i**

a white solid with the yield (84%). mp: 95-97 °C.  $[\alpha]_D^{29}$  4.4 (c1, CHCl<sub>3</sub>). <sup>1</sup>H NMR (400 MHz, CDCl<sub>3</sub>) δ 0.92 (d, *J* = 6.7 Hz, 3H), 1.06 (d, *J* = 6.8 Hz, 3H), 1.17 (s, 9H), 1.61 (s, 3H), 2.40 (m, 1H), 4.03 (s, 1H), 4.93 (dd, *J* = 23.9, 15.7 Hz, 2H), 6.78 (d, *J* = 7.9 Hz, 1H), 7.11 (m, 1H), 7.24-7.41 (m, 6H), 7.52 (d, *J* = 8.4 Hz, 1H); <sup>13</sup>C NMR (101 MHz, CDCl<sub>3</sub>) δ 16.42, 16.72, 22.43, 36.19, 43.77, 56.48, 57.87, 109.25, 122.72, 126.40, 127.19, 127.33, 127.41, 127.69, 128.74, 129.48, 135.59, 143.08, 175.48. HRMS (ESI) calcd For [C<sub>22</sub>H<sub>28</sub>N<sub>2</sub>O<sub>2</sub>SNa, M+Na]<sup>+</sup>: 407.1764, found: 407.1767.

(*S*)-*N*-((*S*)-3-allyl-1-benzyl-2-oxoindolin-3-yl)-2-methylpropane-2-sulfinamide **4j**

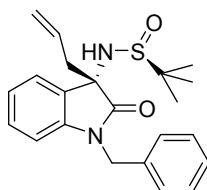

**4j**

a pale yellow solid with the yield (92%). mp: 55-57 °C.  $[\alpha]_D^{29}$  16.3 (c1, CHCl<sub>3</sub>). <sup>1</sup>H NMR (400 MHz, CDCl<sub>3</sub>) δ 1.24 (s, 9H), 2.62-2.84 (m, 2H), 4.33 (s, 1H), 4.95 (dd, *J* = 89.2, 15.8 Hz, 2H), 5.10 (t, *J* = 16.7 Hz, 2H), 5.52-5.66 (m, 1H), 6.71 (d, *J* = 7.9 Hz, 1H), 7.07 (t, *J* = 7.5 Hz, 1H), 7.19-7.40 (m, 7H); <sup>13</sup>C NMR (101 MHz, CDCl<sub>3</sub>) δ 22.72, 43.19, 44.20, 56.14, 63.36, 109.95, 120.76, 122.65, 125.48, 126.59, 127.35, 127.57, 128.75, 129.81, 130.26, 135.55, 143.24, 177.42. HRMS (ESI) calcd For [C<sub>22</sub>H<sub>26</sub>N<sub>2</sub>O<sub>2</sub>SNa, M+Na]<sup>+</sup>: 405.1607, found: 405.1607.

(*S*)-*N*-((*S*)-1-benzyl-2-oxo-3-phenylindolin-3-yl)-2-methylpropane-2-sulfinamide **4k**

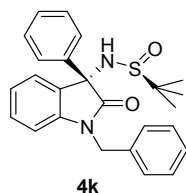

a pale yellow solid with the yield (85%). mp: 115-118 °C.  $[\alpha]_D^{25}$  30.5 (c1, CHCl<sub>3</sub>). <sup>1</sup>H NMR (400 MHz, CDCl<sub>3</sub>) δ 1.25 (s, 9H), 4.37 (s, 1H), 4.96 (dd, *J* = 40.5, 15.8 Hz, 2H), 6.81 (d, *J* = 8.0 Hz, 1H), 7.15 (t, *J* = 7.6 Hz, 1H), 7.25-7.40 (m, 9H), 7.50-7.55 (m, 3H); <sup>13</sup>C NMR (101 MHz, CDCl<sub>3</sub>) δ 22.52, 44.02, 56.97, 67.85, 109.78, 123.23, 126.70, 127.15, 127.72, 128.71, 128.77, 128.86, 129.43, 129.83, 135.38, 139.22, 142.52, 175.7. HRMS (ESI) calcd For [C<sub>25</sub>H<sub>26</sub>N<sub>2</sub>O<sub>2</sub>SNa, M+Na]<sup>+</sup>: 441.1607, found: 441.1611.

(*S*)-*N*-((*S*)-1-benzyl-2-oxo-3-(*p*-tolyl)indolin-3-yl)-2-methylpropane-2-sulfonamide **4l**

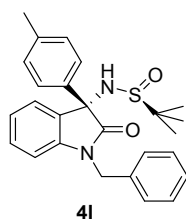

a pale yellow solid with the yield (88%). mp: 67-68 °C.  $[\alpha]_D^{29}$  9.6 (c1, CHCl<sub>3</sub>). <sup>1</sup>H NMR (400 MHz, CDCl<sub>3</sub>) δ 1.25 (s, 9H), 2.35 (s, 3H), 4.35 (s, 1H), 4.94 (dd, *J* = 40.9, 15.8 Hz, 2H), 6.80 (d, *J* = 7.8 Hz, 1H), 7.12-7.21 (m, 3H), 7.24-7.33 (m, 6H), 7.41 (d, *J* = 8.2 Hz, 2H), 7.49 (d, *J* = 6.9 Hz, 1H); <sup>13</sup>C NMR (101 MHz, CDCl<sub>3</sub>) δ 21.12, 22.52, 43.99, 56.97, 67.62, 109.78, 123.22, 126.90, 127.10, 127.13, 127.70, 128.79, 129.56, 129.79, 135.39, 136.17, 138.70, 142.46, 175.80. HRMS (ESI) calcd For [C<sub>26</sub>H<sub>28</sub>N<sub>2</sub>O<sub>2</sub>SNa, M+Na]<sup>+</sup>: 455.1764, found: 455.1768.

(*S*)-*N*-((*S*)-1-benzyl-3-ethyl-2-oxoindolin-3-yl)-2-methylpropane-2-sulfonamide **4m**

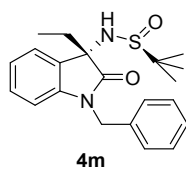

a white solid with the yield (95%). mp: 74-76 °C.  $[\alpha]_D^{29}$  12.3 (c1, CHCl<sub>3</sub>). <sup>1</sup>H NMR (400 MHz, CDCl<sub>3</sub>) δ 0.71 (t, *J* = 7.4 Hz, 3H), 1.17 (s, 9H), 2.20 (q, *J* = 7.5 Hz, 2H), 3.89 (s, 1H), 4.94 (s, 2H), 6.77 (d, *J* = 7.8 Hz, 1H), 7.12 (t, *J* = 7.5 Hz, 1H), 7.22-7.35 (m, 6H), 7.52 (d, *J* = 7.4 Hz, 1H); <sup>13</sup>C NMR (101 MHz, CDCl<sub>3</sub>) δ 8.15, 22.39, 32.22, 43.82, 56.41, 65.46, 109.44, 123.04, 125.55, 127.22, 127.73, 128.12, 128.79, 129.57, 135.50, 142.85, 176.42. HRMS (ESI) calcd For [C<sub>21</sub>H<sub>27</sub>N<sub>2</sub>O<sub>2</sub>S, M+H]<sup>+</sup>: 371.1788, found: 371.1793.

(*S*)-*N*-((*S*)-1-benzyl-3-methyl-2-oxoindolin-3-yl)-2-methylpropane-2-sulfonamide **4n**

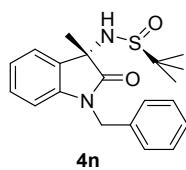

a pale yellow solid with the yield (94%). mp: 76-77 °C.  $[\alpha]_D^{29}$  4.8 (c1, CHCl<sub>3</sub>). <sup>1</sup>H NMR (400 MHz, CDCl<sub>3</sub>) δ 1.25 (s, 9H), 1.66 (s, 3H), 4.27 (s, 1H), 4.96 (dd, *J* = 43.1, 16.3 Hz, 2H), 6.74 (d, *J* = 7.8 Hz, 1H), 7.08 (t, *J* =



7.2 Hz, 1H), 7.20-7.40 (m, 7H);  $^{13}\text{C}$  NMR (101 MHz,  $\text{CDCl}_3$ )  $\delta$  22.62, 25.55, 44.13, 56.01, 60.60, 110.02, 122.90, 124.75, 127.17, 127.39, 128.84, 129.67, 135.59, 142.55, 178.22.

(S)-3-amino-1-benzyl-3-methylindolin-2-one **5**

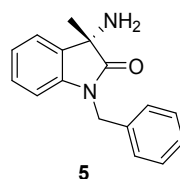

a pale yellow solid.  $[\alpha]_D^{29}$  -30.6 (c1,  $\text{CHCl}_3$ ).  $^1\text{H}$  NMR (400 MHz,  $\text{CDCl}_3$ )  $\delta$  1.54 (s, 3H), 2.09 (s, 2H), 4.92 (dd,  $J = 64.0$ , 15.2 Hz, 2H), 6.76 (d,  $J = 7.8$  Hz, 1H), 7.07 (t,  $J = 7.5$  Hz, 1H), 7.20 (t,  $J = 7.7$  Hz, 1H), 7.25-7.37 (m, 5H), 7.44 (d,  $J = 7.3$  Hz, 1H);  $^{13}\text{C}$  NMR (101 MHz,  $\text{CDCl}_3$ )  $\delta$  25.72, 43.71, 57.87, 109.34, 123.02, 123.44, 127.23, 127.70, 128.85, 133.20, 135.82, 141.76, 181.18.

## 1. $^1\text{H}$ NMR Spectrum of 4a.

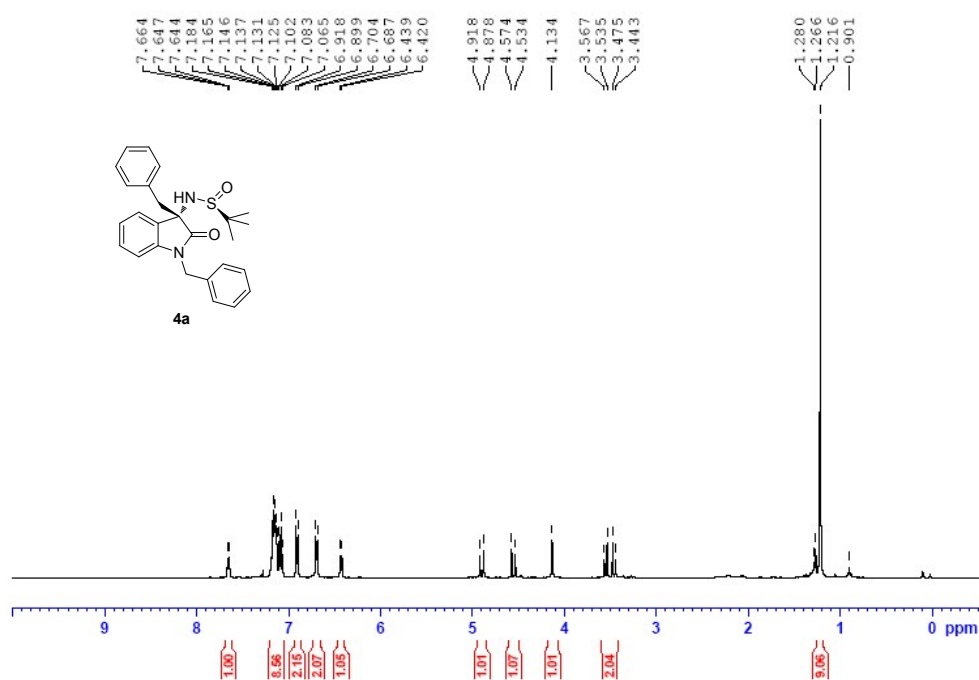

## 2. $^{13}\text{C}$ NMR Spectrum of 4a.

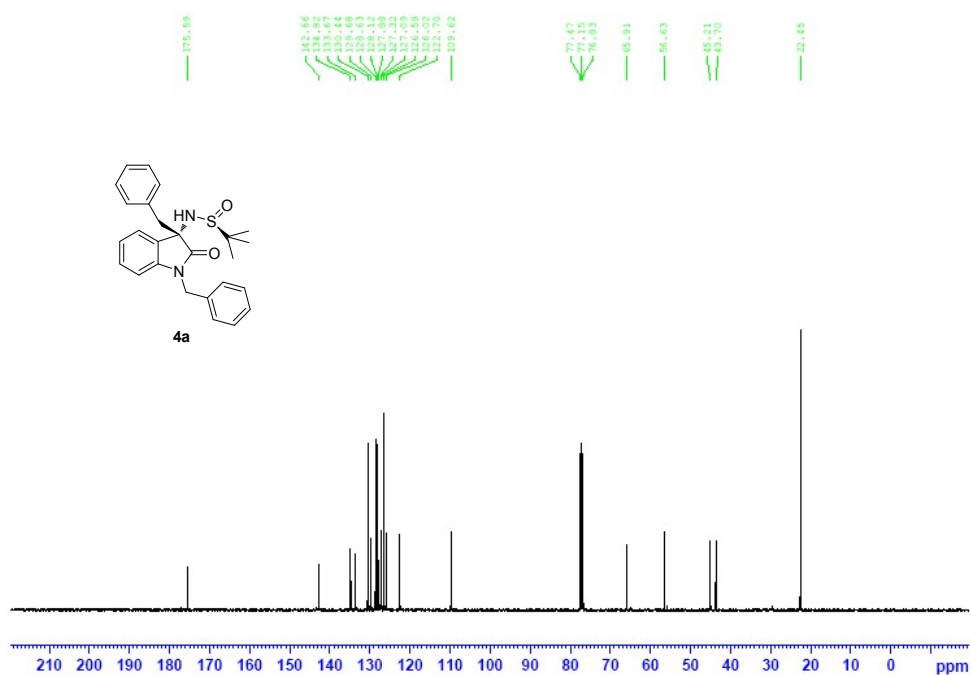

### 3. <sup>1</sup>H NMR Spectrum of 4a'.

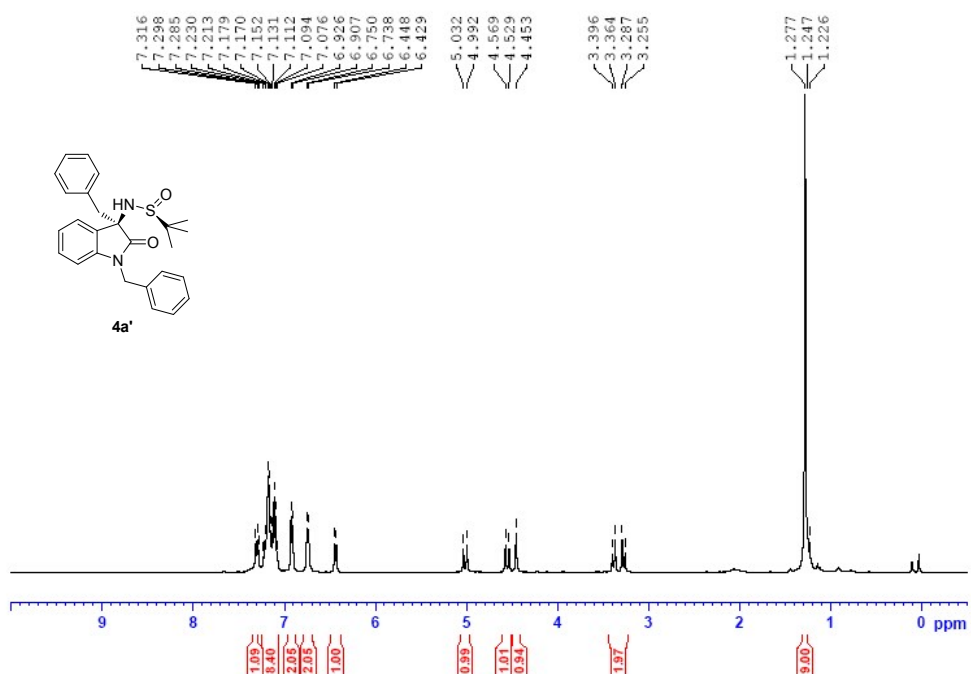

### 4. <sup>13</sup>C NMR Spectrum of 4a'.

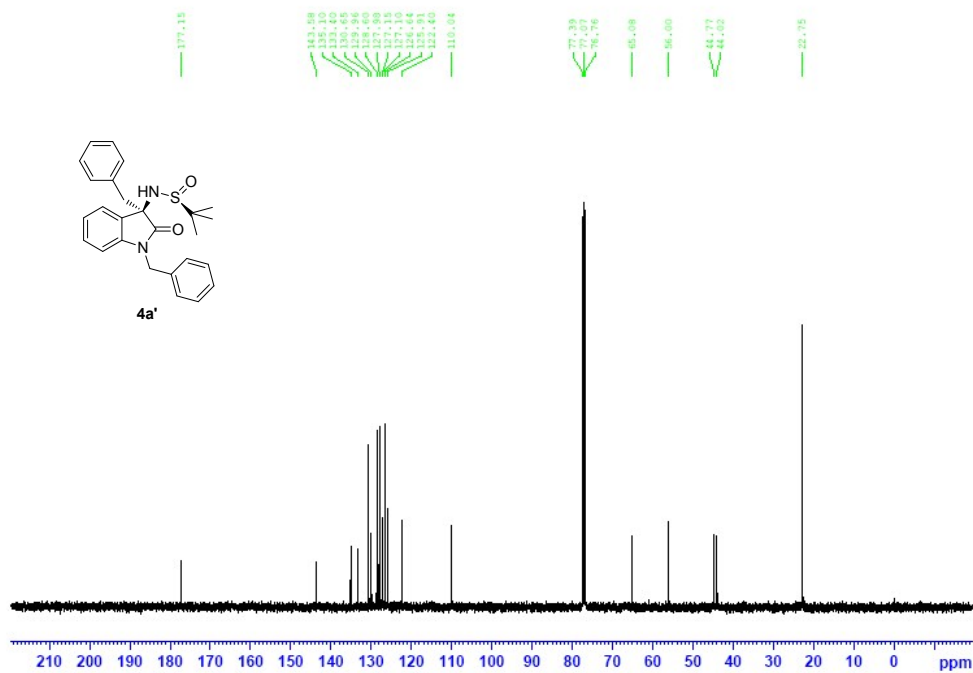

## 5. HPLC (4a mixed with 4a')

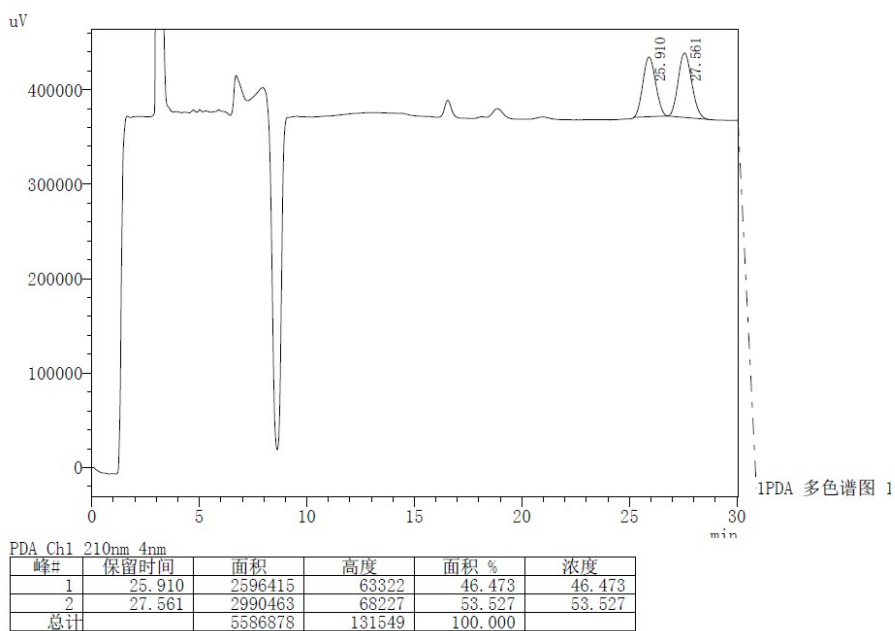

Chiracel AD-H Column (4.6\*250 mm); detected at 210nm; n-hexane / i-propanol = 90 / 10; flow = 1.0 mL / min; Retention time: 25.9 min (4a), 27.5 min (4a').

## 6. HPLC (4a without purification)

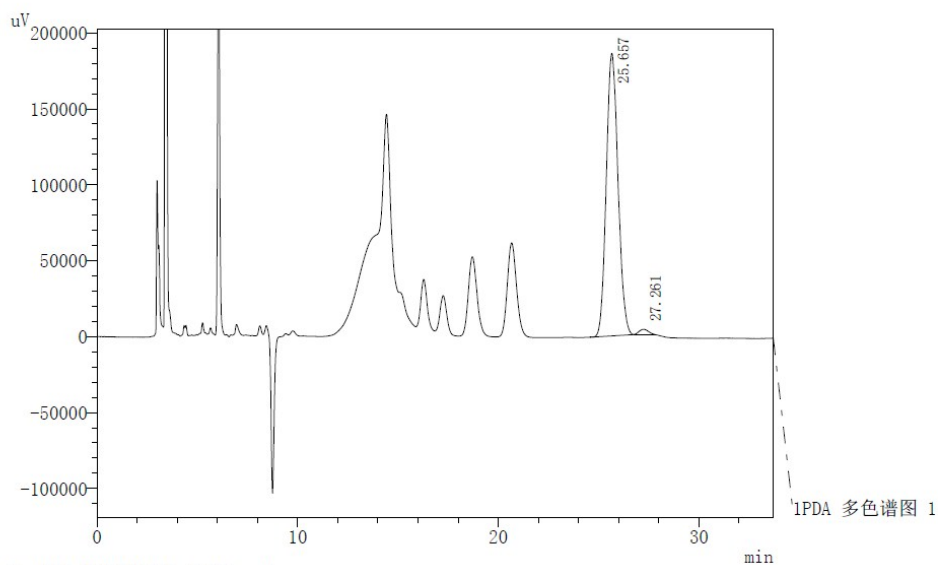

1 PDA 多色谱图 1 / 210nm 4nm

PDA Ch1 210nm 4nm

| 峰# | 保留时间   | 面积      | 高度     | 面积 %    | 浓度     |
|----|--------|---------|--------|---------|--------|
| 1  | 25.657 | 7583850 | 186139 | 98.529  | 98.529 |
| 2  | 27.261 | 113225  | 3479   | 1.471   | 1.471  |
| 总计 |        | 7697075 | 189618 | 100.000 |        |

Chiracel AD-H Column (4.6\*250 mm); detected at 210 nm; n-hexane / i-propanol = 90 / 10; flow = 1.0 mL/min; Retention time: 25.7 min (4a), 27.3 min (4a'). 98.5:1.5 dr.

## 7. <sup>1</sup>H NMR Spectrum of 4b.

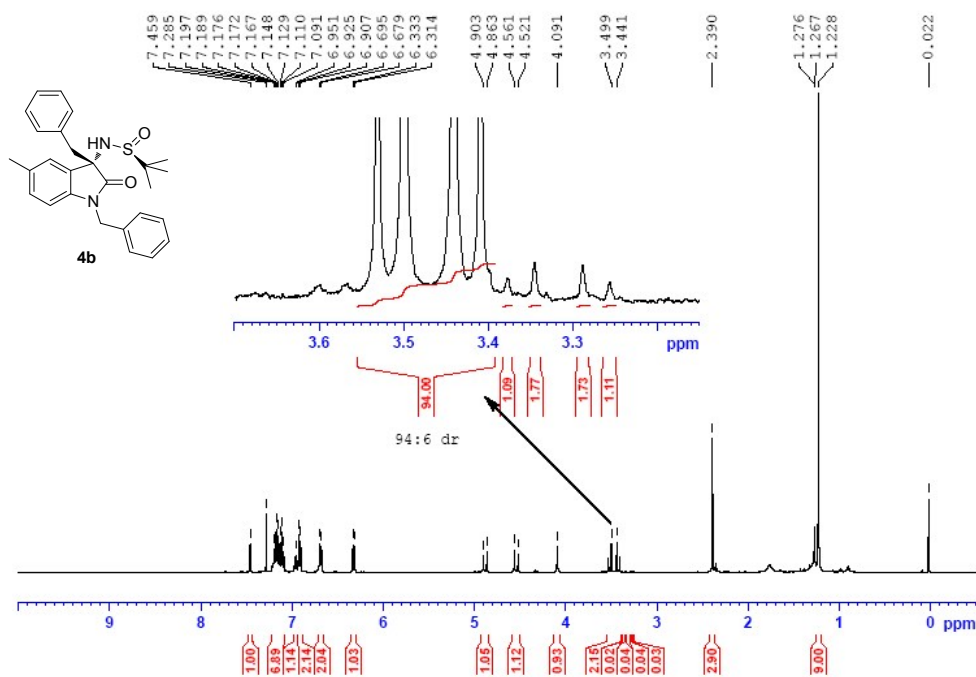

## 8. <sup>13</sup>C NMR Spectrum of 4b.

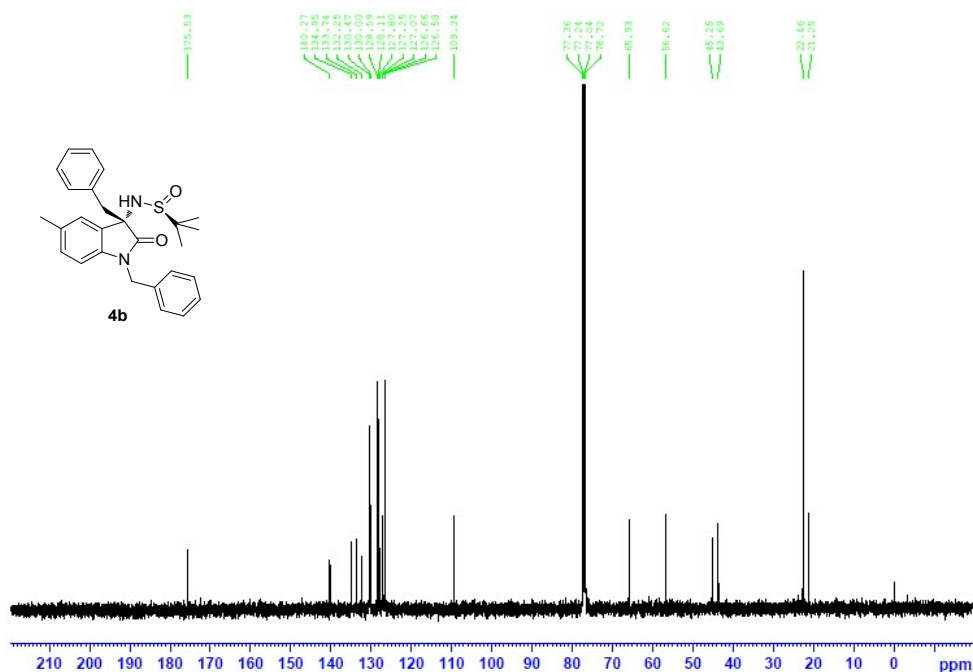

### 9. <sup>1</sup>H NMR Spectrum of 4c.

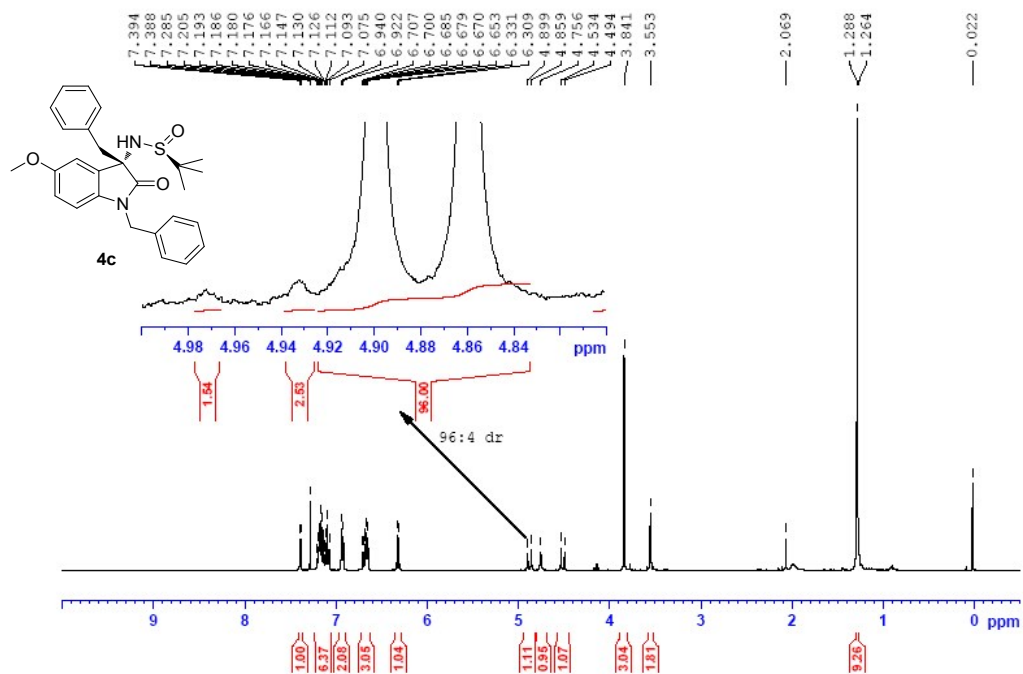

### 10. <sup>13</sup>C NMR Spectrum of 4c.

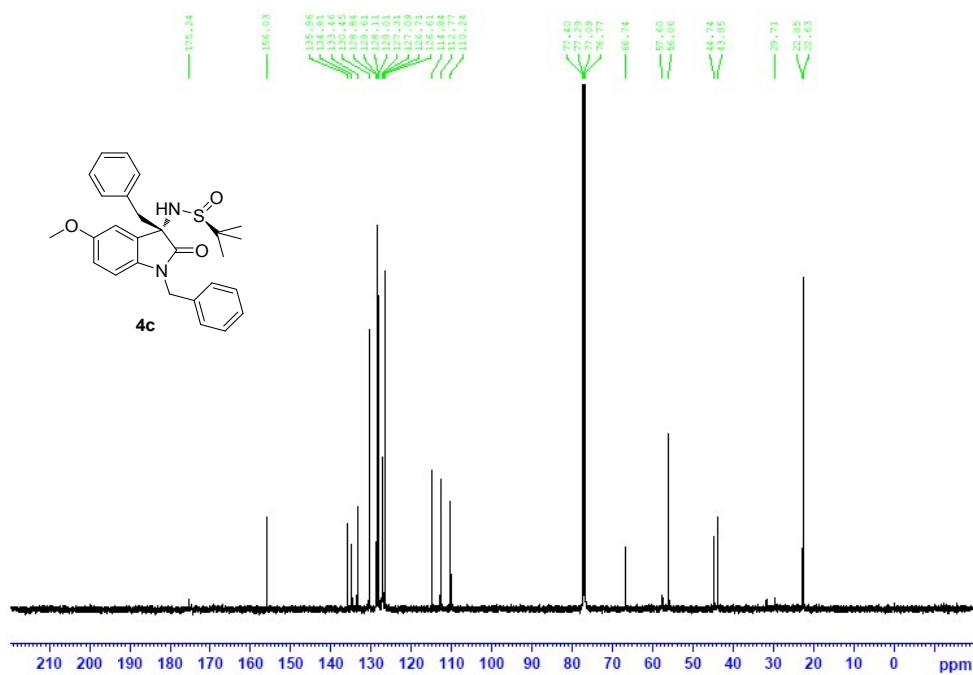

### 11. <sup>1</sup>H NMR Spectrum of 4d.

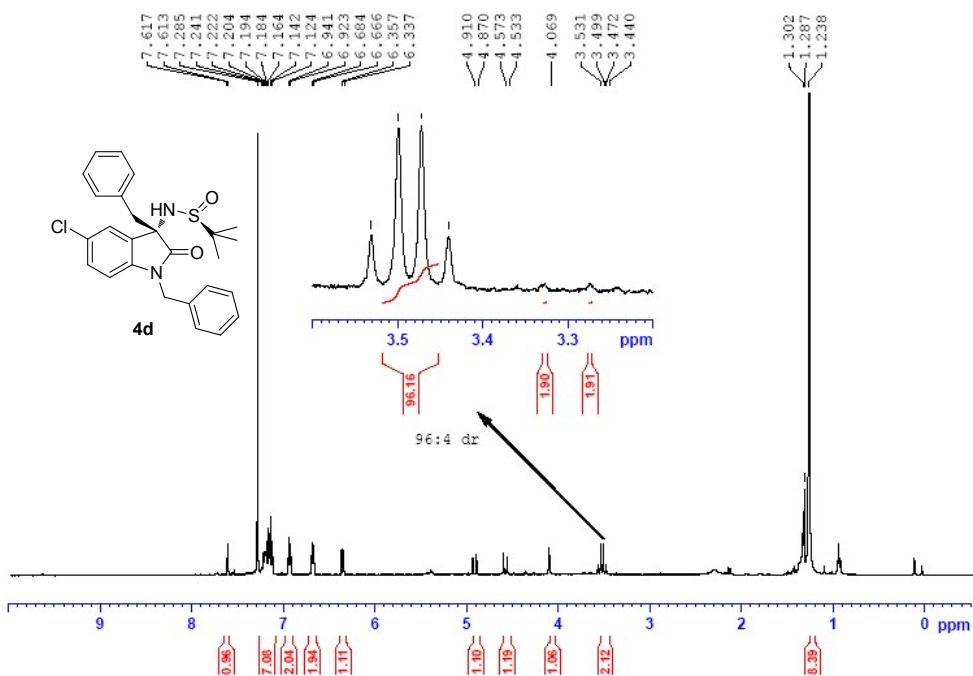

### 12. <sup>13</sup>C NMR Spectrum of 4d.

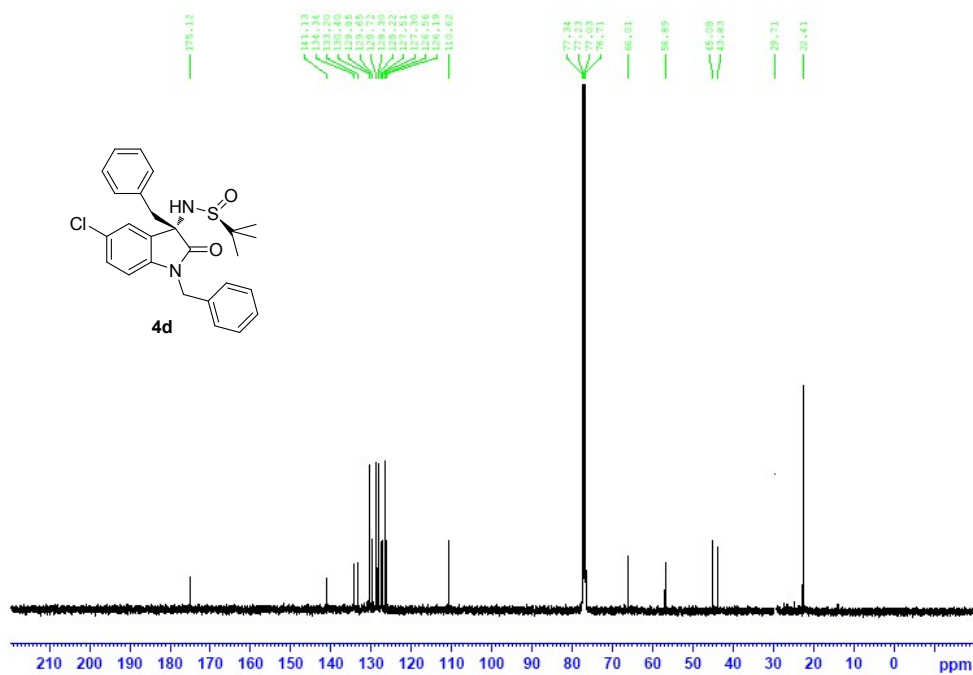

### 13. <sup>1</sup>H NMR Spectrum of 4e.

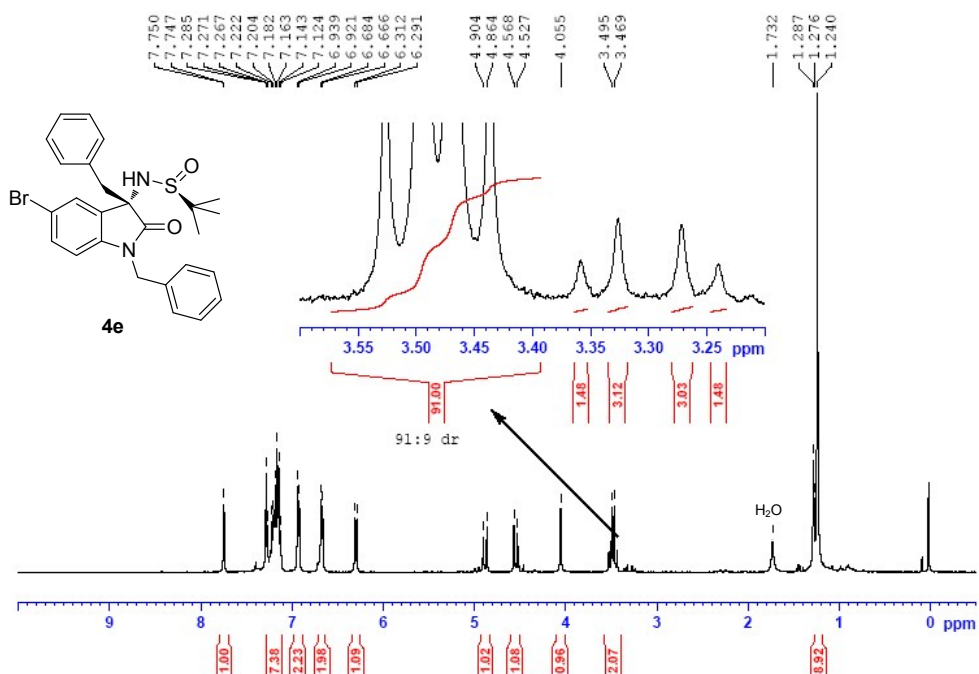

### 14. <sup>13</sup>C NMR Spectrum of 4e.

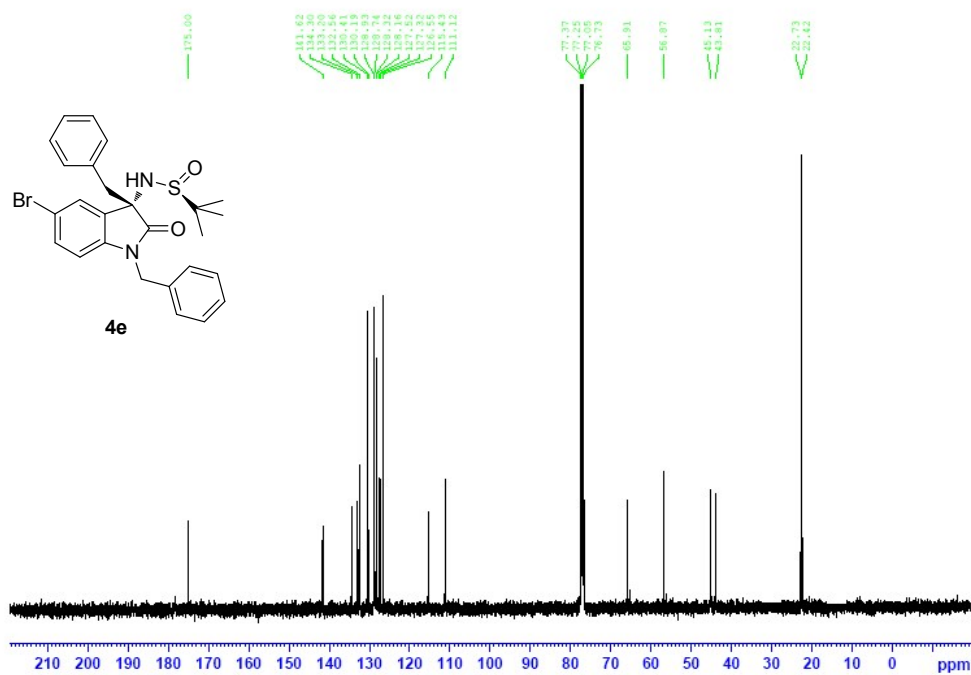

### 15. <sup>1</sup>H NMR Spectrum of 4f.

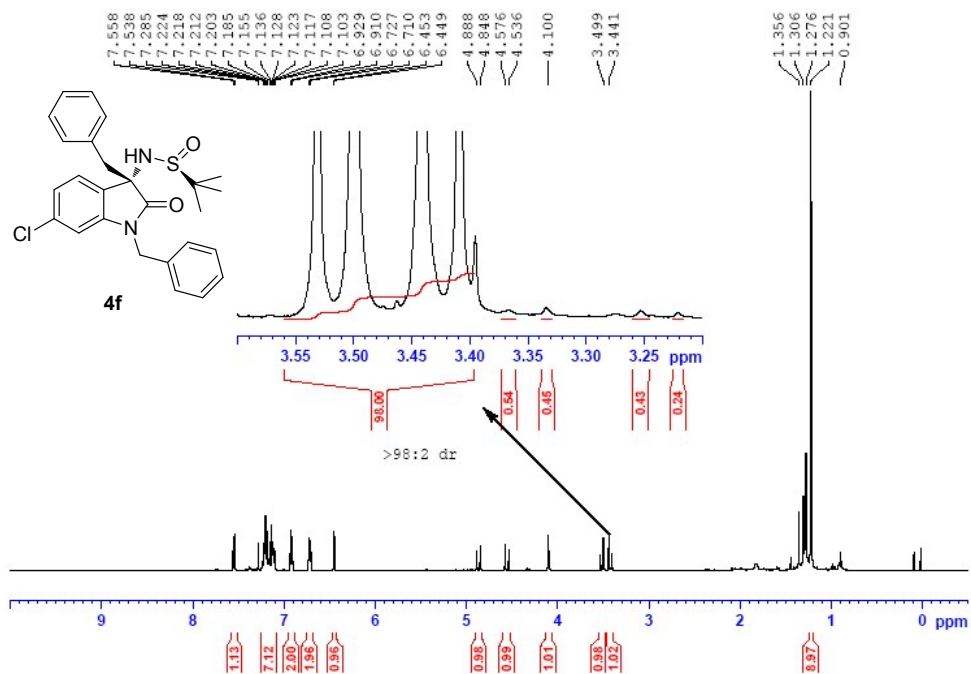

### 16. <sup>13</sup>C NMR Spectrum of 4f.



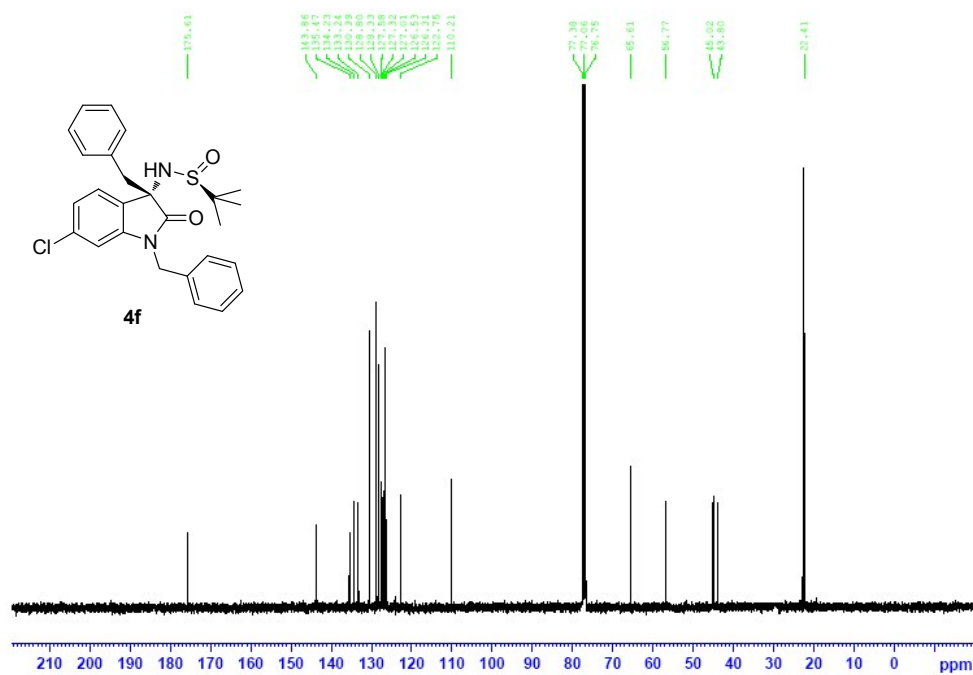

### 17. <sup>1</sup>H NMR Spectrum of 4g.

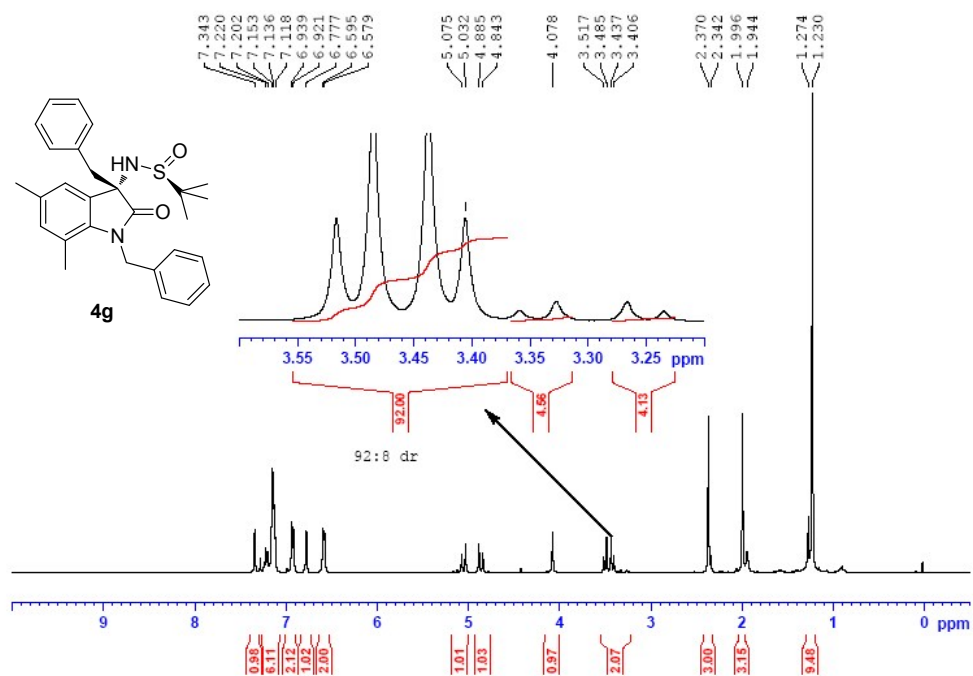

### 18. <sup>13</sup>C NMR Spectrum of 4g.

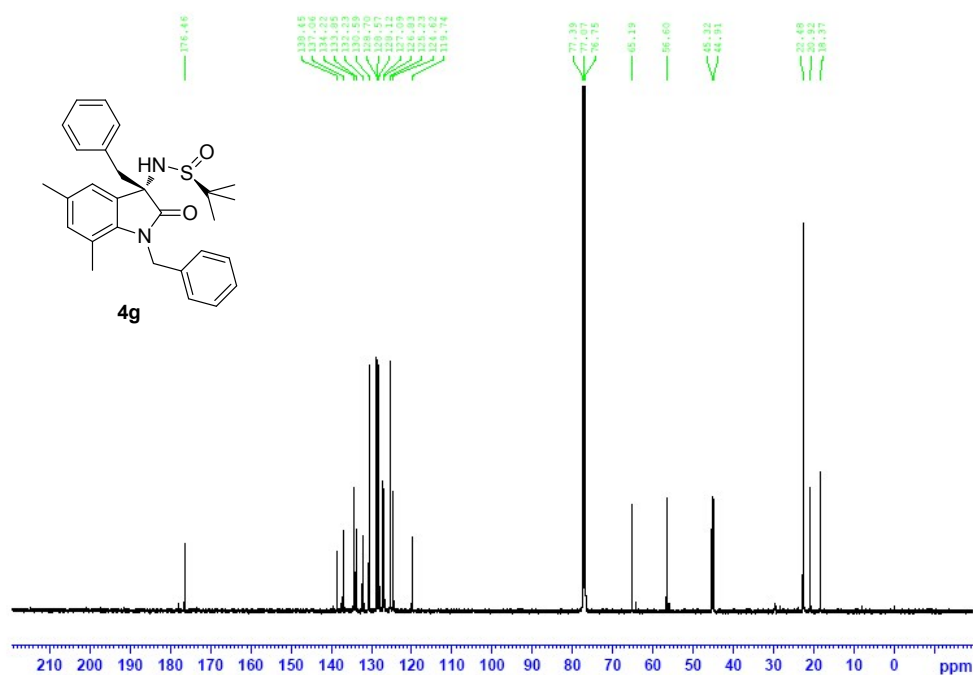

### 19. <sup>1</sup>H NMR Spectrum of 4h.

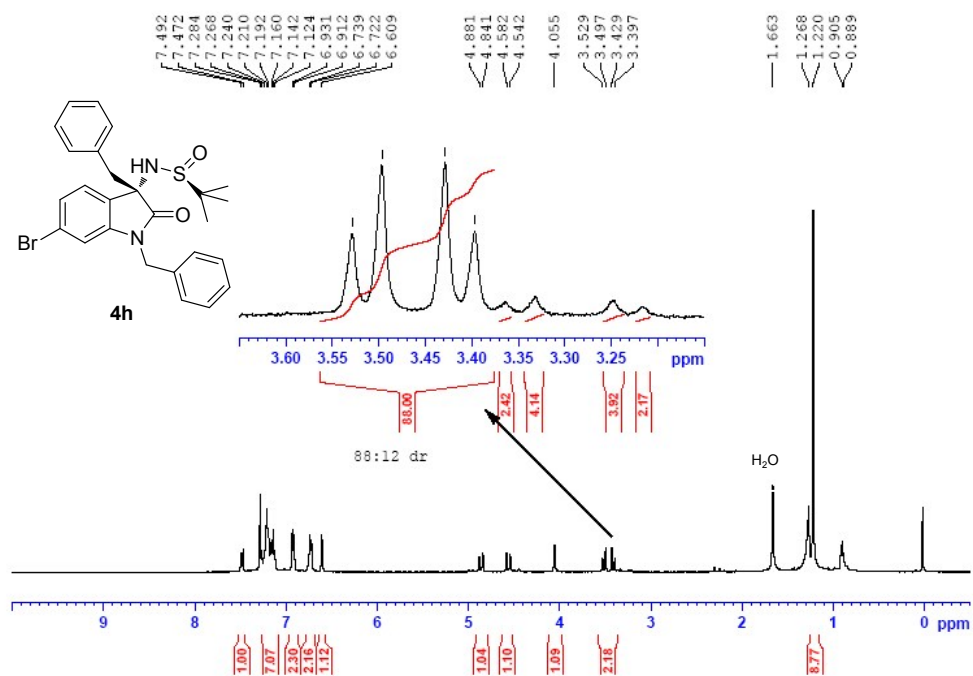

### 20. <sup>13</sup>C NMR Spectrum of 4h.

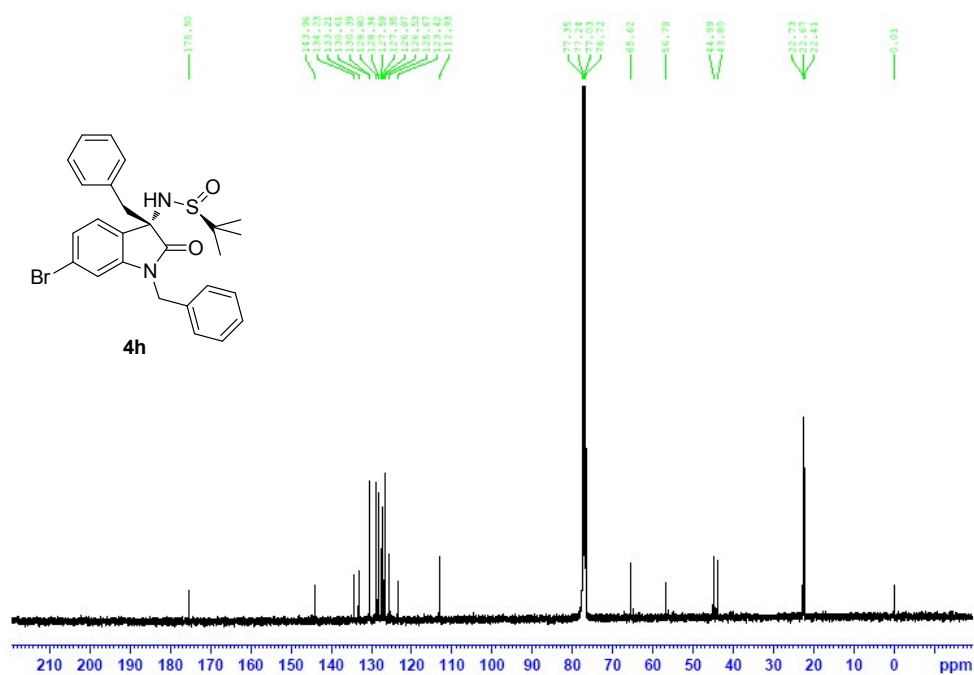

## 21. <sup>1</sup>H NMR Spectrum of 4h'.

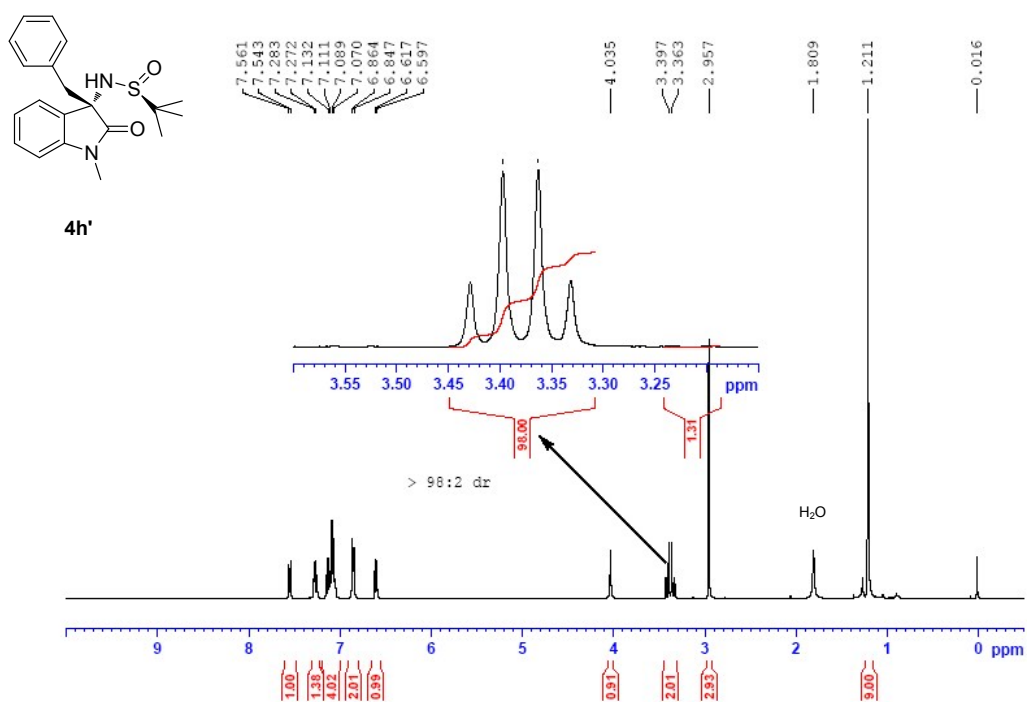

## 22. <sup>13</sup>C NMR Spectrum of 4h'.

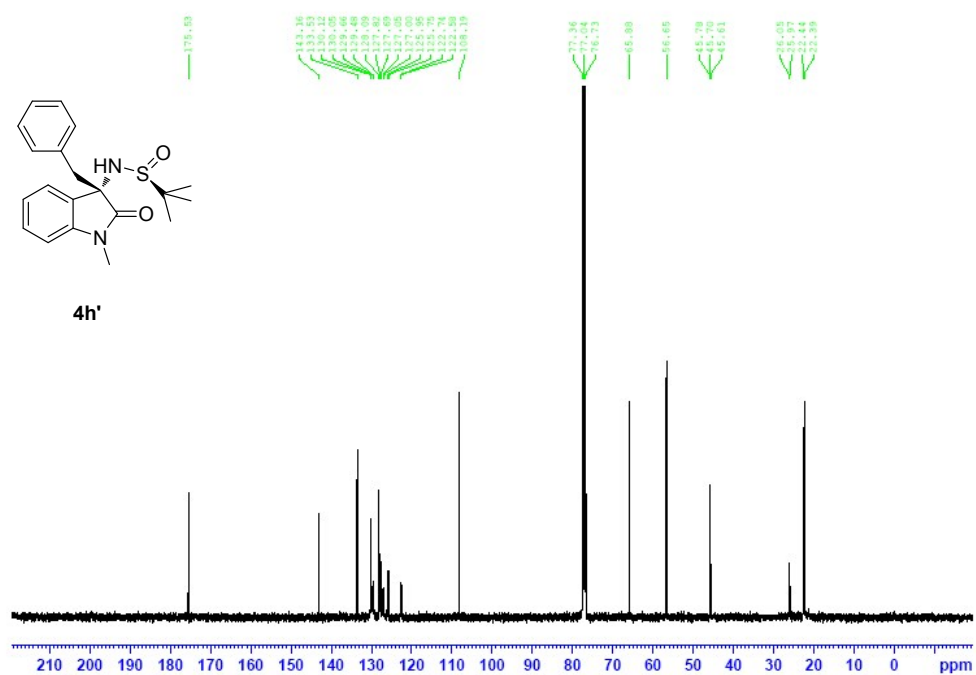

### 23. <sup>1</sup>H NMR Spectrum of 4i.

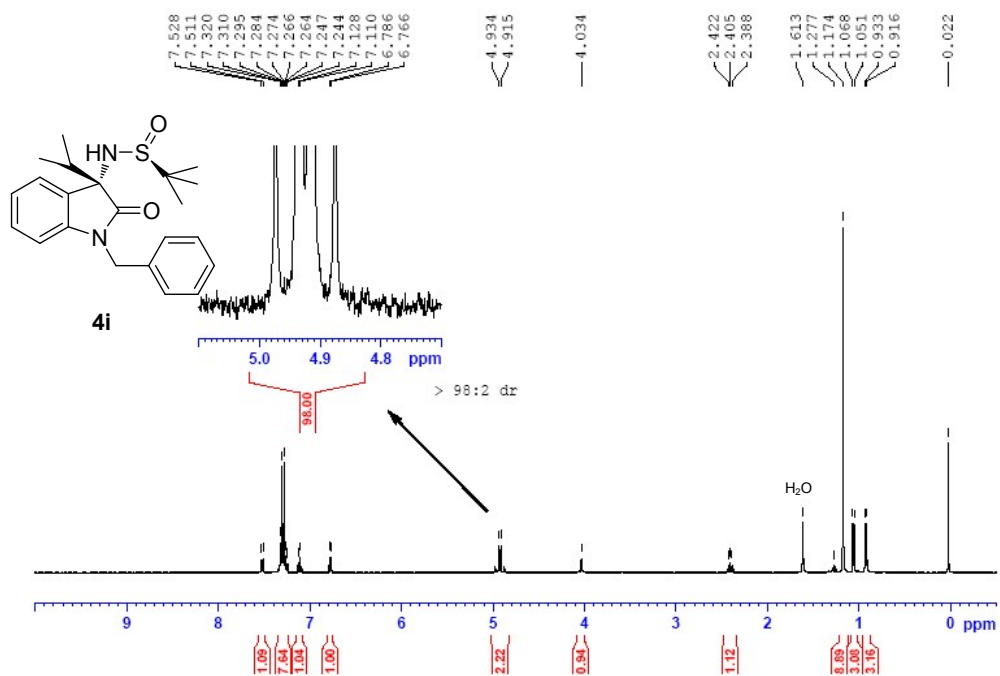

### 24. <sup>13</sup>C NMR Spectrum of 4i.

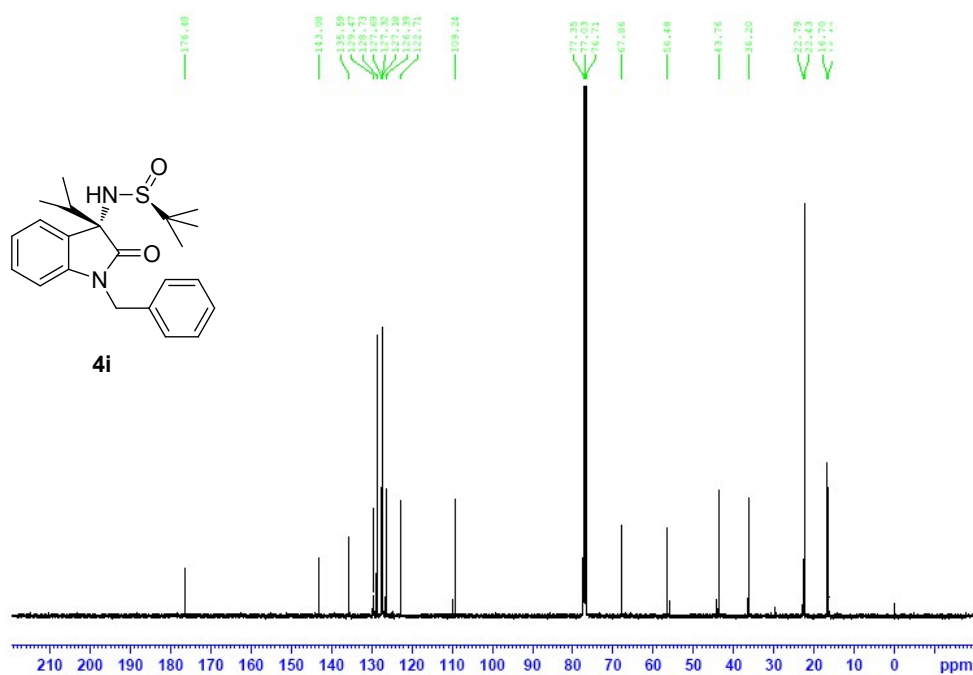

## 25. <sup>1</sup>H NMR Spectrum of 4j.

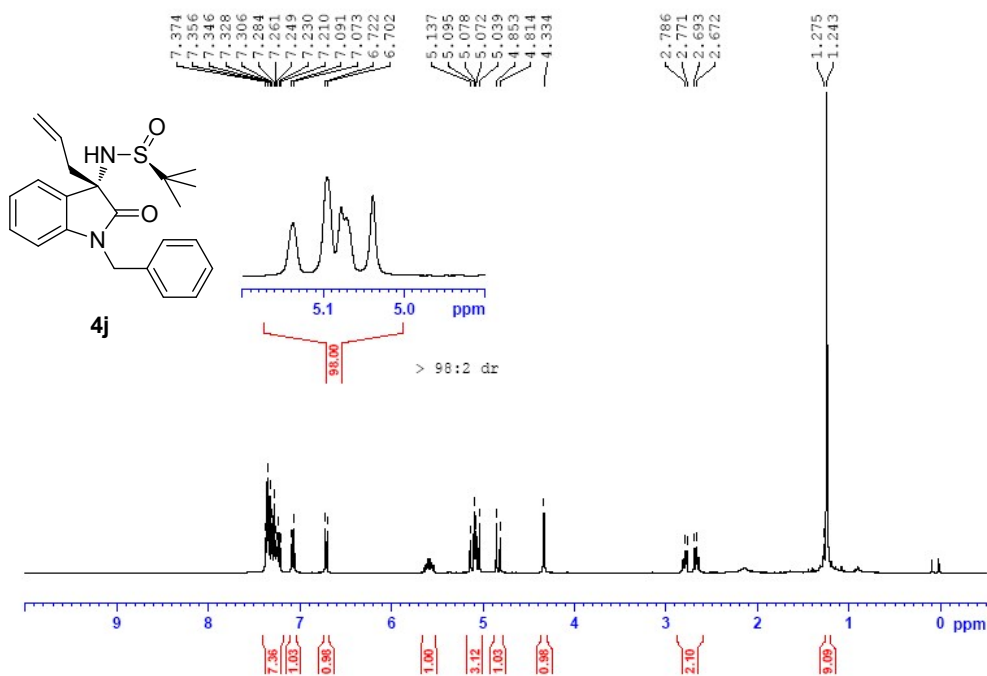

## 26. <sup>13</sup>C NMR Spectrum of 4j.

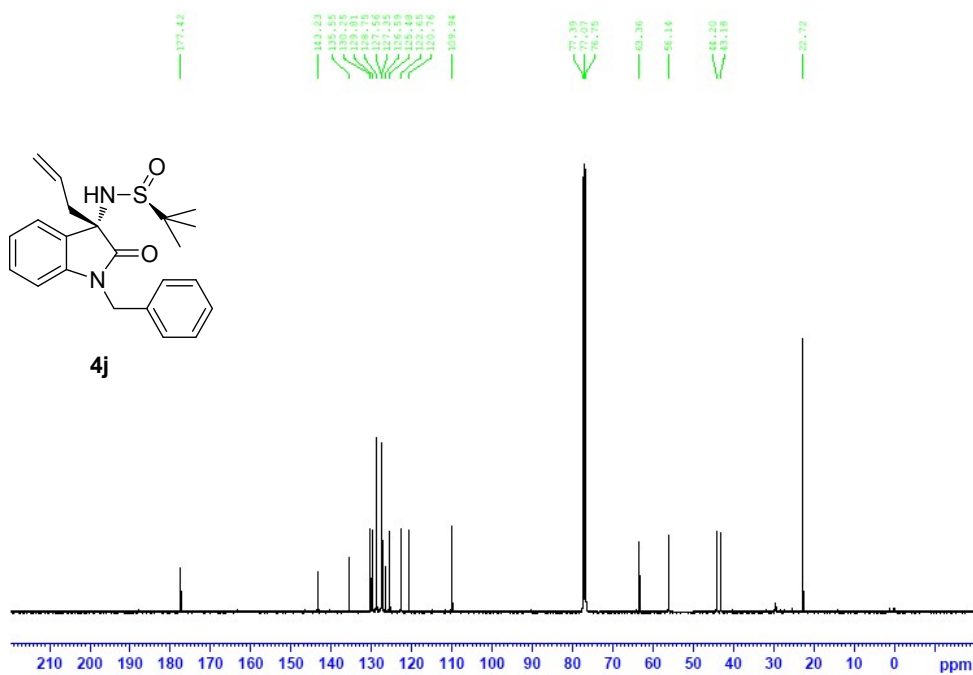

## 27. <sup>1</sup>H NMR Spectrum of 4k.

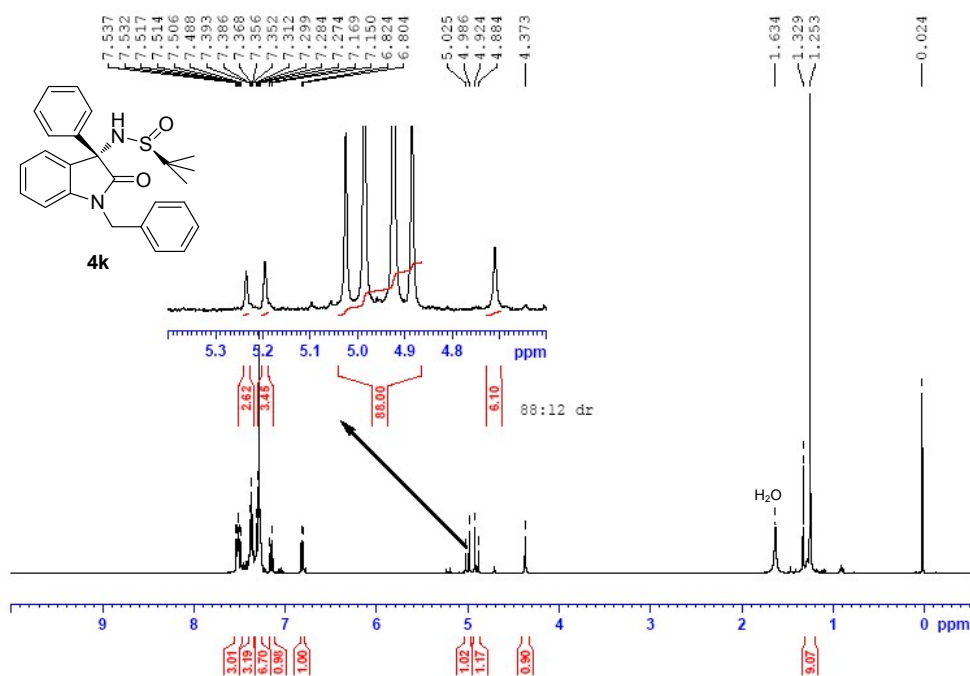

## 28. <sup>13</sup>C NMR Spectrum of 4k.

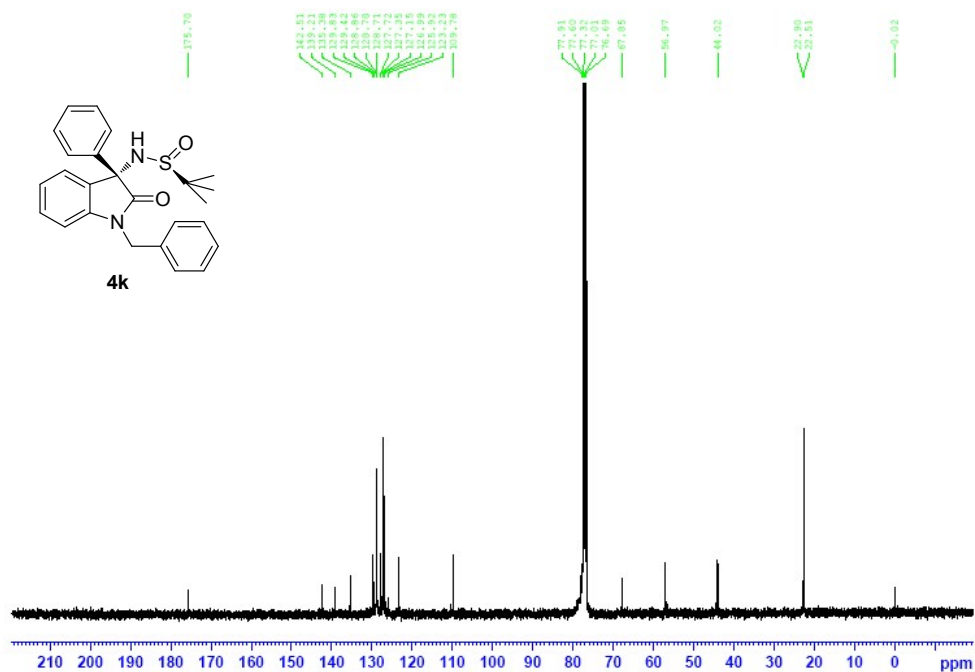

### 29. <sup>1</sup>H NMR Spectrum of 4l.

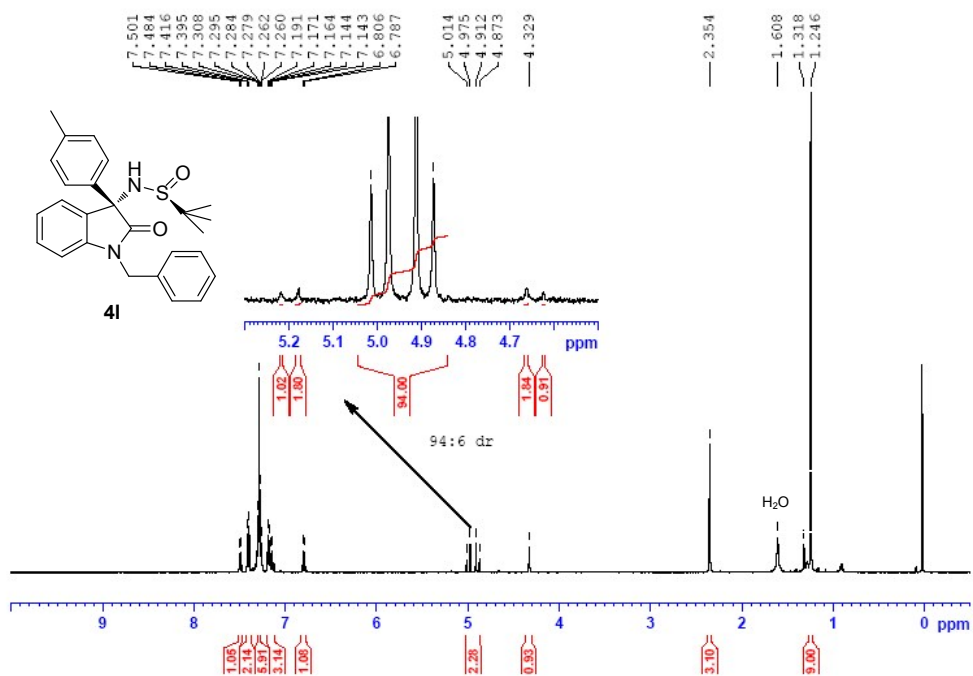

### 30. <sup>13</sup>C NMR Spectrum of 4l.

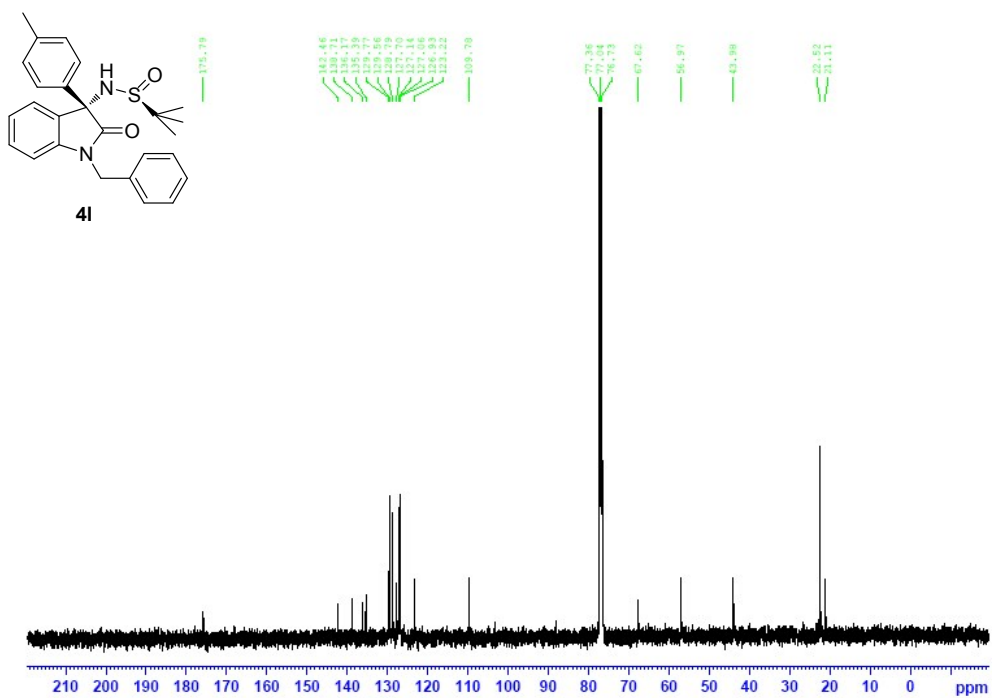

### 31. <sup>1</sup>H NMR Spectrum of 4m.

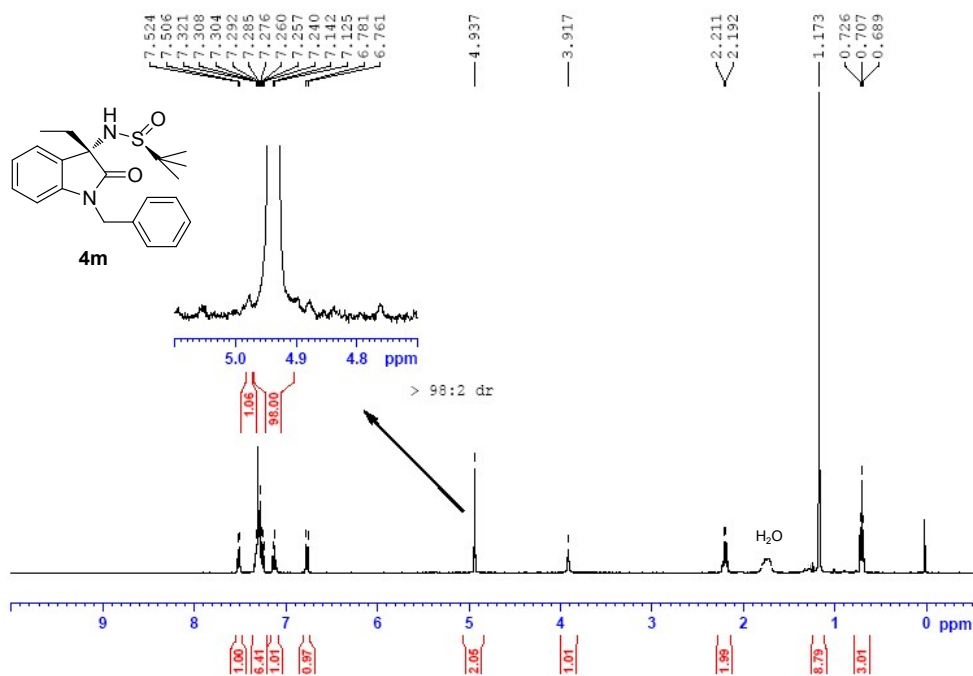

### 32. <sup>13</sup>C NMR Spectrum of 4m.



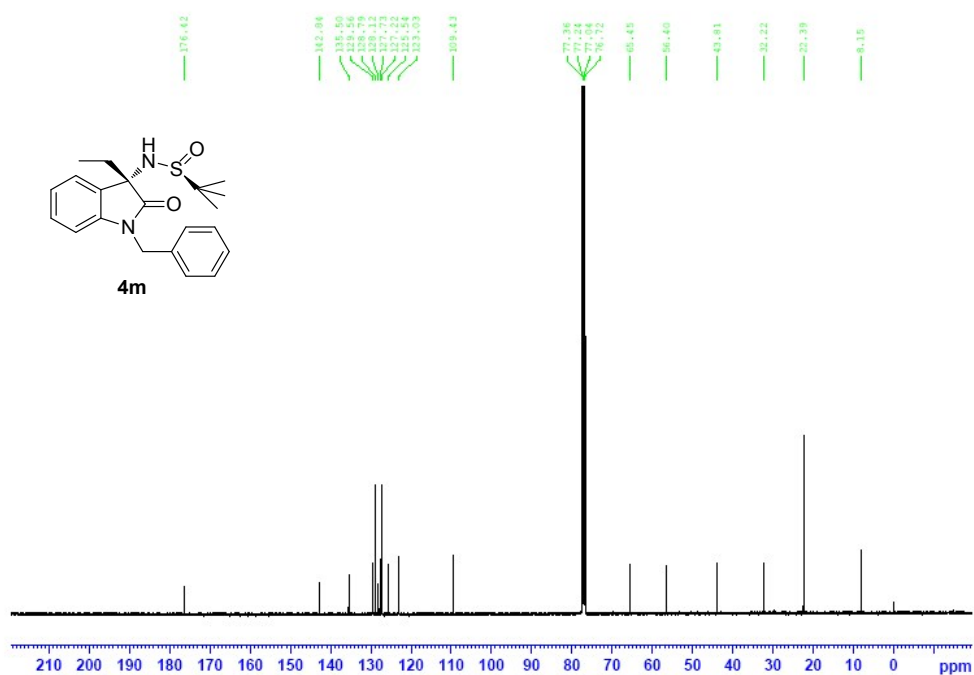

### 33. <sup>1</sup>H NMR Spectrum of 4n.

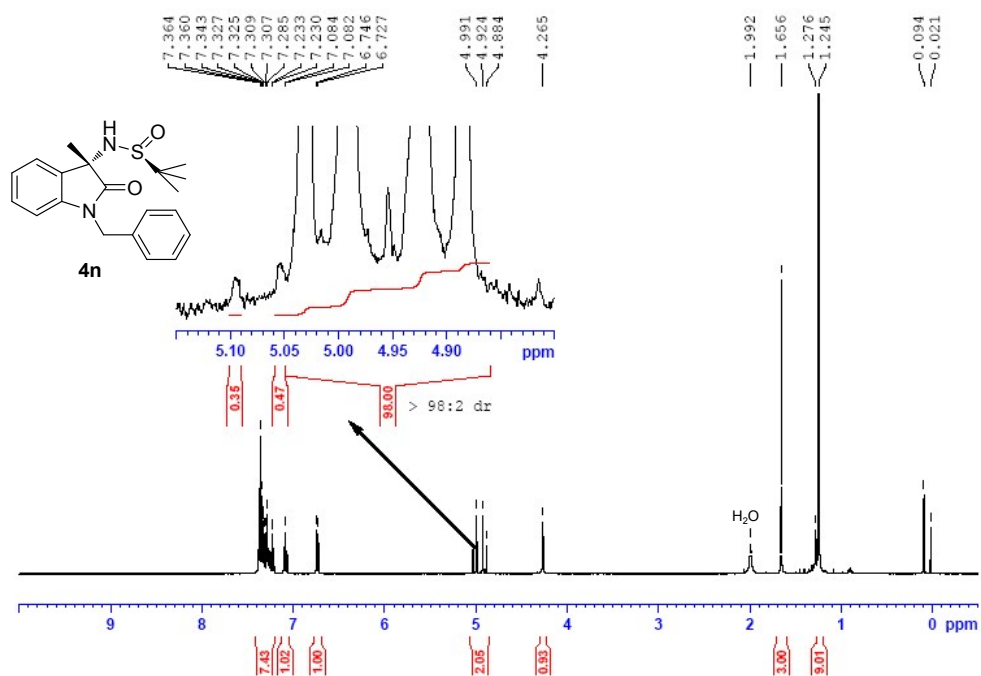

### 34. <sup>13</sup>C NMR Spectrum of 4n.

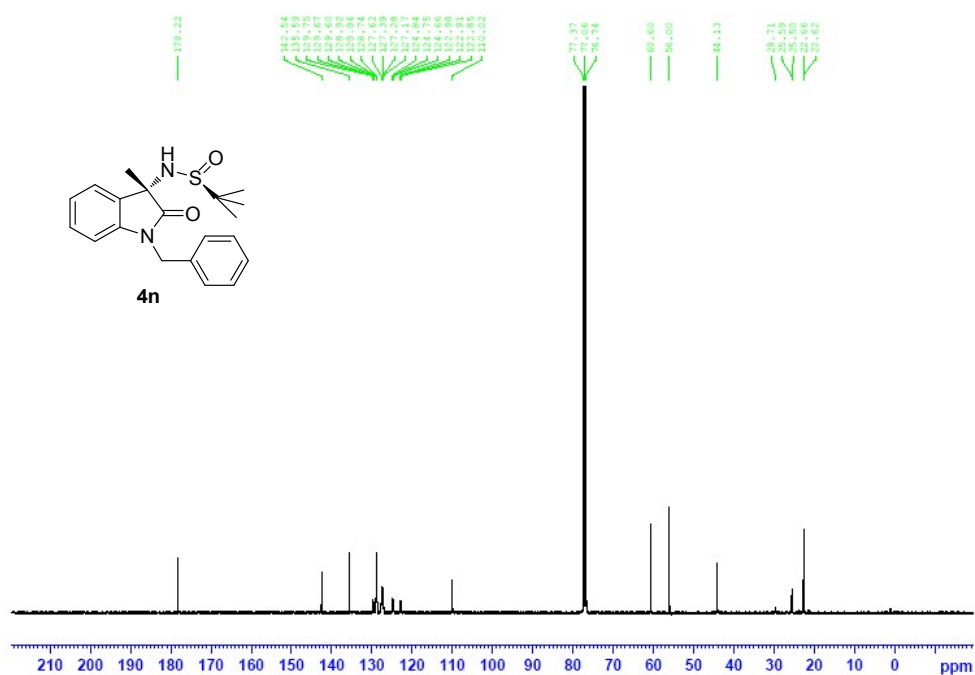

**35. <sup>1</sup>H NMR Spectrum of 5.**

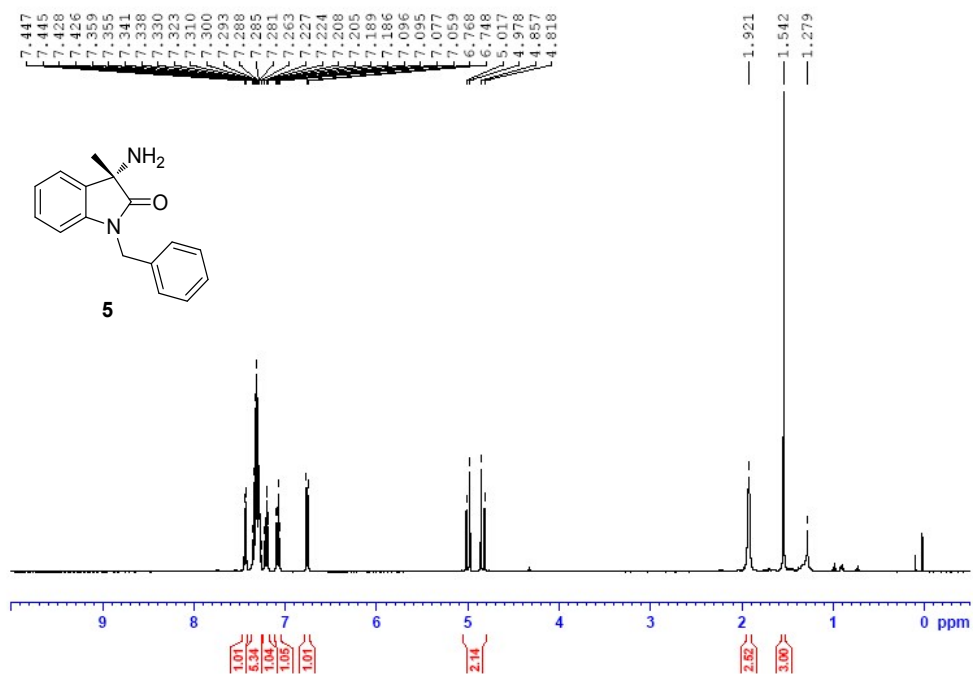

**36. <sup>13</sup>C NMR Spectrum of 5.**

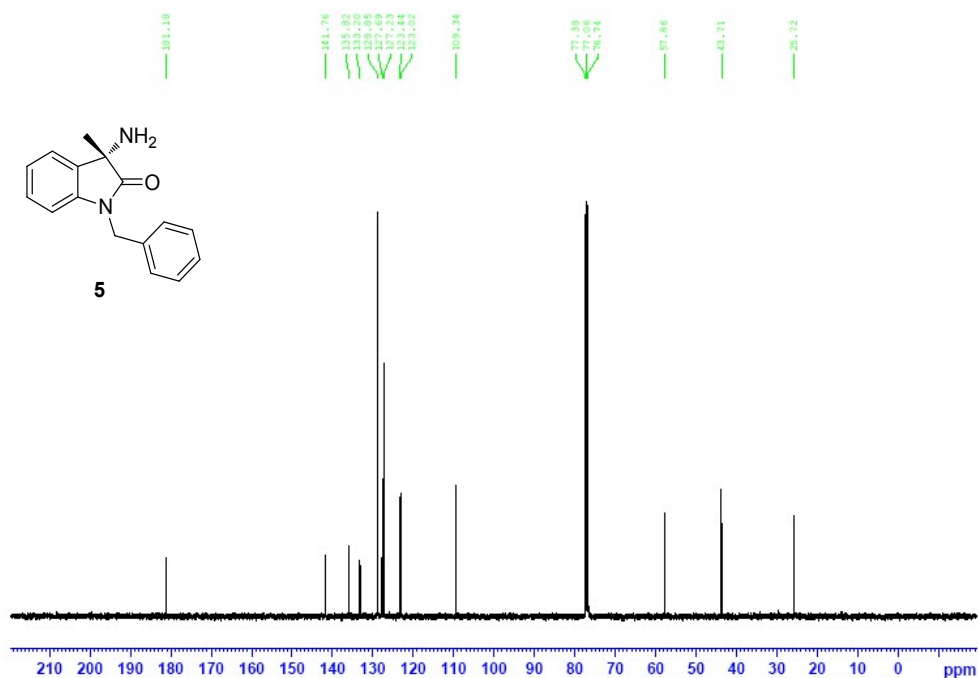

### 37. Determination of the Absolute Configuration of **4m** by single-crystal X-ray analysis.

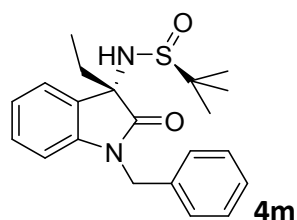

The absolute configuration of **4m** was confirmed by diffraction measurements on the crystal. The Supplementary crystallographic data were deposited as **CCDC 152303**. Copies of the data can be obtained free of charge on application to CCDC, 12 Union Road, Cambridge CB21EZ, U.K, e-mail: [deposit@ccdc.cam.ac.uk](mailto:deposit@ccdc.cam.ac.uk).

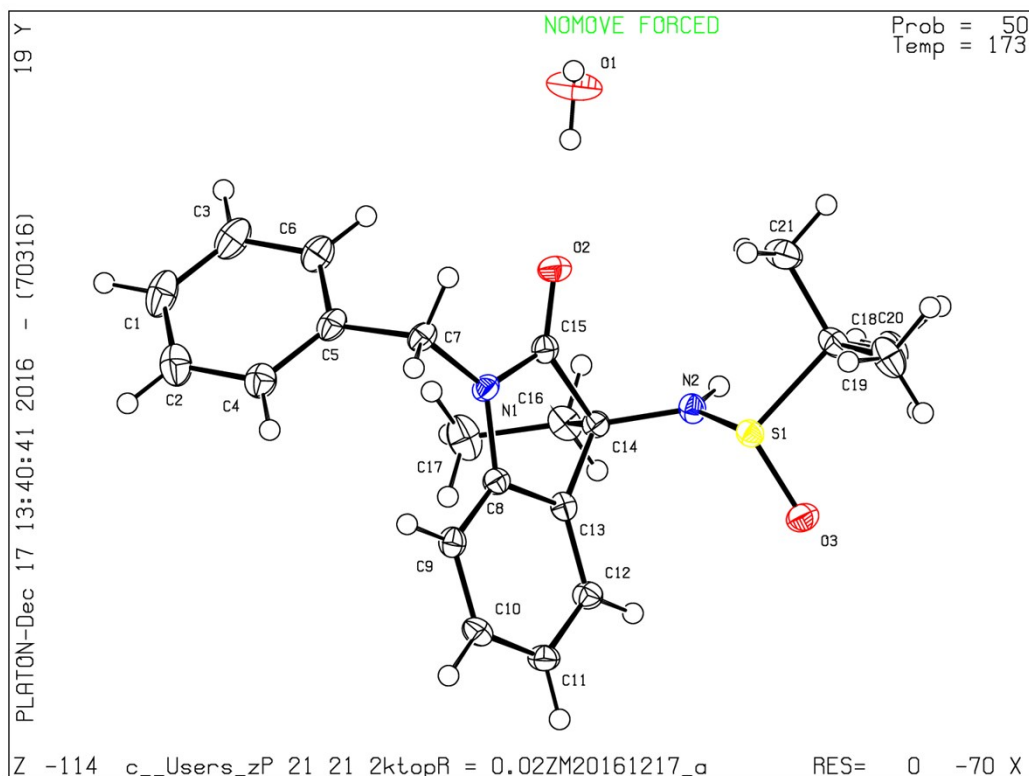

**Figure X-ray structure of 4m**

**Table 1. Crystal data and structure refinement for 4m.**

|                      |                                                                 |                 |
|----------------------|-----------------------------------------------------------------|-----------------|
| Identification code  | <b>4m</b>                                                       |                 |
| Empirical formula    | C <sub>21</sub> H <sub>26</sub> N <sub>2</sub> O <sub>2</sub> S |                 |
| Formula weight       | 370.51                                                          |                 |
| Temperature          | 173(2) K                                                        |                 |
| Wavelength           | 1.54184 Å                                                       |                 |
| Unit cell dimensions | a = 8.62560(10) Å                                               | alpha = 90 deg. |
|                      | b = 22.3286(3) Å                                                | beta = 90 deg.  |
|                      | c = 10.6389(2) Å                                                | gamma = 90 deg. |

**Table 2. Atomic coordinates (x 10<sup>4</sup>) and equivalent isotropic displacement parameters (Å<sup>2</sup> x 10<sup>3</sup>) for a 4m. U(eq) is defined as one third of the trace of the orthogonal U<sub>ij</sub> tensor.**

|      | x       | y       | z       | U(eq) |
|------|---------|---------|---------|-------|
| S(1) | 2101(1) | 6332(1) | 7152(1) | 17(1) |
| O(3) | 407(1)  | 6421(1) | 7415(1) | 23(1) |
| O(2) | 5588(1) | 5816(1) | 5091(1) | 23(1) |
| N(1) | 4660(1) | 6649(1) | 4068(1) | 18(1) |

|       |         |         |         |       |
|-------|---------|---------|---------|-------|
| O(1)  | 8437(1) | 5529(1) | 6268(1) | 38(1) |
| N(2)  | 2355(1) | 5803(1) | 6102(1) | 18(1) |
| C(15) | 4519(1) | 6124(1) | 4708(1) | 17(1) |
| C(8)  | 3201(1) | 6911(1) | 3846(1) | 17(1) |
| C(18) | 2882(2) | 5959(1) | 8565(1) | 21(1) |
| C(10) | 1331(2) | 7627(1) | 3220(1) | 21(1) |
| C(7)  | 6157(1) | 6908(1) | 3722(1) | 20(1) |
| C(11) | 158(2)  | 7266(1) | 3677(1) | 21(1) |
| C(5)  | 6701(1) | 6731(1) | 2421(1) | 21(1) |
| C(9)  | 2890(2) | 7461(1) | 3295(1) | 19(1) |
| C(12) | 500(1)  | 6715(1) | 4233(1) | 19(1) |
| C(14) | 2769(1) | 5972(1) | 4816(1) | 17(1) |
| C(13) | 2035(2) | 6542(1) | 4317(1) | 17(1) |
| C(16) | 2437(2) | 5425(1) | 3971(1) | 23(1) |
| C(20) | 1908(2) | 5409(1) | 8884(1) | 28(1) |
| C(4)  | 6464(2) | 7107(1) | 1396(1) | 25(1) |
| C(2)  | 7071(2) | 6960(1) | 222(1)  | 32(1) |
| C(6)  | 7525(2) | 6197(1) | 2249(1) | 26(1) |
| C(21) | 4576(2) | 5804(1) | 8301(1) | 29(1) |
| C(3)  | 8125(2) | 6054(1) | 1074(2) | 31(1) |
| C(1)  | 7902(2) | 6436(1) | 62(1)   | 34(1) |
| C(17) | 2835(2) | 5525(1) | 2587(1) | 33(1) |
| C(19) | 2773(2) | 6435(1) | 9598(1) | 30(1) |

**Table 3. Bond lengths [Å] and angles [deg] for a 4m.**

|             |            |
|-------------|------------|
| S(1)-O(3)   | 1.5010(9)  |
| S(1)-N(2)   | 1.6408(10) |
| S(1)-C(18)  | 1.8457(12) |
| O(2)-C(15)  | 1.2189(15) |
| N(1)-C(15)  | 1.3619(15) |
| N(1)-C(8)   | 1.4082(15) |
| N(1)-C(7)   | 1.4621(15) |
| O(1)-H(31)  | 0.80(2)    |
| O(1)-H(32)  | 0.89(2)    |
| N(2)-C(14)  | 1.4624(15) |
| N(2)-H(2)   | 0.8800     |
| C(15)-C(14) | 1.5514(16) |
| C(8)-C(9)   | 1.3870(16) |
| C(8)-C(13)  | 1.3933(17) |
| C(18)-C(20) | 1.5253(17) |
| C(18)-C(21) | 1.5273(19) |
| C(18)-C(19) | 1.5316(18) |

|                 |            |
|-----------------|------------|
| C(10)-C(11)     | 1.3822(18) |
| C(10)-C(9)      | 1.3970(18) |
| C(10)-H(10)     | 0.9500     |
| C(7)-C(5)       | 1.5141(17) |
| C(7)-H(7A)      | 0.9900     |
| C(7)-H(7B)      | 0.9900     |
| C(11)-C(12)     | 1.3976(17) |
| C(11)-H(11)     | 0.9500     |
| C(5)-C(4)       | 1.3918(19) |
| C(5)-C(6)       | 1.4007(18) |
| C(9)-H(9)       | 0.9500     |
| C(12)-C(13)     | 1.3823(17) |
| C(12)-H(12)     | 0.9500     |
| C(14)-C(13)     | 1.5187(16) |
| C(14)-C(16)     | 1.5431(16) |
| C(16)-C(17)     | 1.5288(18) |
| C(16)-H(16A)    | 0.9900     |
| C(16)-H(16B)    | 0.9900     |
| C(20)-H(20A)    | 0.9800     |
| C(20)-H(20B)    | 0.9800     |
| C(20)-H(20C)    | 0.9800     |
| C(4)-C(2)       | 1.394(2)   |
| C(4)-H(4)       | 0.9500     |
| C(2)-C(1)       | 1.384(2)   |
| C(2)-H(2A)      | 0.9500     |
| C(6)-C(3)       | 1.389(2)   |
| C(6)-H(6)       | 0.9500     |
| C(21)-H(21A)    | 0.9800     |
| C(21)-H(21B)    | 0.9800     |
| C(21)-H(21C)    | 0.9800     |
| C(3)-C(1)       | 1.387(2)   |
| C(3)-H(3)       | 0.9500     |
| C(1)-H(1)       | 0.9500     |
| C(17)-H(17A)    | 0.9800     |
| C(17)-H(17B)    | 0.9800     |
| C(17)-H(17C)    | 0.9800     |
| C(19)-H(19A)    | 0.9800     |
| C(19)-H(19B)    | 0.9800     |
| C(19)-H(19C)    | 0.9800     |
| O(3)-S(1)-N(2)  | 110.56(5)  |
| O(3)-S(1)-C(18) | 105.27(6)  |
| N(2)-S(1)-C(18) | 100.40(6)  |
| C(15)-N(1)-C(8) | 111.24(10) |
| C(15)-N(1)-C(7) | 123.11(10) |

|                   |            |
|-------------------|------------|
| C(8)-N(1)-C(7)    | 125.60(10) |
| H(31)-O(1)-H(32)  | 108(2)     |
| C(14)-N(2)-S(1)   | 118.98(8)  |
| C(14)-N(2)-H(2)   | 120.5      |
| S(1)-N(2)-H(2)    | 120.5      |
| O(2)-C(15)-N(1)   | 125.72(11) |
| O(2)-C(15)-C(14)  | 126.03(11) |
| N(1)-C(15)-C(14)  | 108.21(9)  |
| C(9)-C(8)-C(13)   | 122.41(11) |
| C(9)-C(8)-N(1)    | 127.73(11) |
| C(13)-C(8)-N(1)   | 109.81(10) |
| C(20)-C(18)-C(21) | 112.69(11) |
| C(20)-C(18)-C(19) | 111.37(11) |
| C(21)-C(18)-C(19) | 110.36(12) |
| C(20)-C(18)-S(1)  | 110.12(9)  |
| C(21)-C(18)-S(1)  | 107.56(9)  |
| C(19)-C(18)-S(1)  | 104.35(8)  |
| C(11)-C(10)-C(9)  | 122.05(11) |
| C(11)-C(10)-H(10) | 119.0      |
| C(9)-C(10)-H(10)  | 119.0      |
| N(1)-C(7)-C(5)    | 113.58(10) |
| N(1)-C(7)-H(7A)   | 108.8      |
| C(5)-C(7)-H(7A)   | 108.8      |
| N(1)-C(7)-H(7B)   | 108.8      |
| C(5)-C(7)-H(7B)   | 108.8      |
| H(7A)-C(7)-H(7B)  | 107.7      |
| C(10)-C(11)-C(12) | 120.52(12) |
| C(10)-C(11)-H(11) | 119.7      |
| C(12)-C(11)-H(11) | 119.7      |
| C(4)-C(5)-C(6)    | 119.09(12) |
| C(4)-C(5)-C(7)    | 120.82(11) |
| C(6)-C(5)-C(7)    | 120.00(12) |
| C(8)-C(9)-C(10)   | 116.40(11) |
| C(8)-C(9)-H(9)    | 121.8      |
| C(10)-C(9)-H(9)   | 121.8      |
| C(13)-C(12)-C(11) | 118.36(11) |
| C(13)-C(12)-H(12) | 120.8      |
| C(11)-C(12)-H(12) | 120.8      |
| N(2)-C(14)-C(13)  | 116.17(10) |
| N(2)-C(14)-C(16)  | 107.24(9)  |
| C(13)-C(14)-C(16) | 112.49(10) |
| N(2)-C(14)-C(15)  | 111.30(10) |
| C(13)-C(14)-C(15) | 101.32(9)  |
| C(16)-C(14)-C(15) | 108.05(10) |

|                     |            |
|---------------------|------------|
| C(12)-C(13)-C(8)    | 120.26(11) |
| C(12)-C(13)-C(14)   | 130.96(11) |
| C(8)-C(13)-C(14)    | 108.72(11) |
| C(17)-C(16)-C(14)   | 113.85(10) |
| C(17)-C(16)-H(16A)  | 108.8      |
| C(14)-C(16)-H(16A)  | 108.8      |
| C(17)-C(16)-H(16B)  | 108.8      |
| C(14)-C(16)-H(16B)  | 108.8      |
| H(16A)-C(16)-H(16B) | 107.7      |
| C(18)-C(20)-H(20A)  | 109.5      |
| C(18)-C(20)-H(20B)  | 109.5      |
| H(20A)-C(20)-H(20B) | 109.5      |
| C(18)-C(20)-H(20C)  | 109.5      |
| H(20A)-C(20)-H(20C) | 109.5      |
| H(20B)-C(20)-H(20C) | 109.5      |
| C(5)-C(4)-C(2)      | 120.30(13) |
| C(5)-C(4)-H(4)      | 119.8      |
| C(2)-C(4)-H(4)      | 119.8      |
| C(1)-C(2)-C(4)      | 120.31(14) |
| C(1)-C(2)-H(2A)     | 119.8      |
| C(4)-C(2)-H(2A)     | 119.8      |
| C(3)-C(6)-C(5)      | 120.13(14) |
| C(3)-C(6)-H(6)      | 119.9      |
| C(5)-C(6)-H(6)      | 119.9      |
| C(18)-C(21)-H(21A)  | 109.5      |
| C(18)-C(21)-H(21B)  | 109.5      |
| H(21A)-C(21)-H(21B) | 109.5      |
| C(18)-C(21)-H(21C)  | 109.5      |
| H(21A)-C(21)-H(21C) | 109.5      |
| H(21B)-C(21)-H(21C) | 109.5      |
| C(1)-C(3)-C(6)      | 120.42(13) |
| C(1)-C(3)-H(3)      | 119.8      |
| C(6)-C(3)-H(3)      | 119.8      |
| C(2)-C(1)-C(3)      | 119.73(13) |
| C(2)-C(1)-H(1)      | 120.1      |
| C(3)-C(1)-H(1)      | 120.1      |
| C(16)-C(17)-H(17A)  | 109.5      |
| C(16)-C(17)-H(17B)  | 109.5      |
| H(17A)-C(17)-H(17B) | 109.5      |
| C(16)-C(17)-H(17C)  | 109.5      |
| H(17A)-C(17)-H(17C) | 109.5      |
| H(17B)-C(17)-H(17C) | 109.5      |
| C(18)-C(19)-H(19A)  | 109.5      |
| C(18)-C(19)-H(19B)  | 109.5      |



|                     |       |
|---------------------|-------|
| H(19A)-C(19)-H(19B) | 109.5 |
| C(18)-C(19)-H(19C)  | 109.5 |
| H(19A)-C(19)-H(19C) | 109.5 |
| H(19B)-C(19)-H(19C) | 109.5 |
